# Supplementary material for: 5-Arylideneimidazolones with Amine at Position 3 as Potential Antibiotic Adjuvants against Multidrug Resistant Bacteria
Source: MDPI journal article supplement (doi:10.3390/molecules24030438), 2019-01-26
Supplement: s1 [file s1]

## **5-Arylideneimidazolones with Amine at Position 3 as Potential Antibiotic Adjuvants against Multidrug Resistant Bacteria**

Aneta Kaczor<sup>1</sup>, Karolina Witek<sup>1,2,3</sup>, Sabina Podlewska<sup>1,4</sup>, Joanna Czekajewska<sup>2</sup>, Annamaria Lubelska<sup>1</sup>, Gniewomir Latacz<sup>1</sup>, Ewa Żesławska<sup>5</sup>, Wojciech Nitek<sup>6</sup>, Sandrine Alibert<sup>3</sup>, Jean-Marie Pagès<sup>3</sup>, Elżbieta Karczewska<sup>2</sup>, Katarzyna Kieć-Kononowicz<sup>1</sup>, Jadwiga Handzlik<sup>1,\*</sup>

### **Supplementary**

#### **Spectral data for compounds**

##### **<sup>1</sup>H NMRs Compounds**

Compound 7 (basic form)

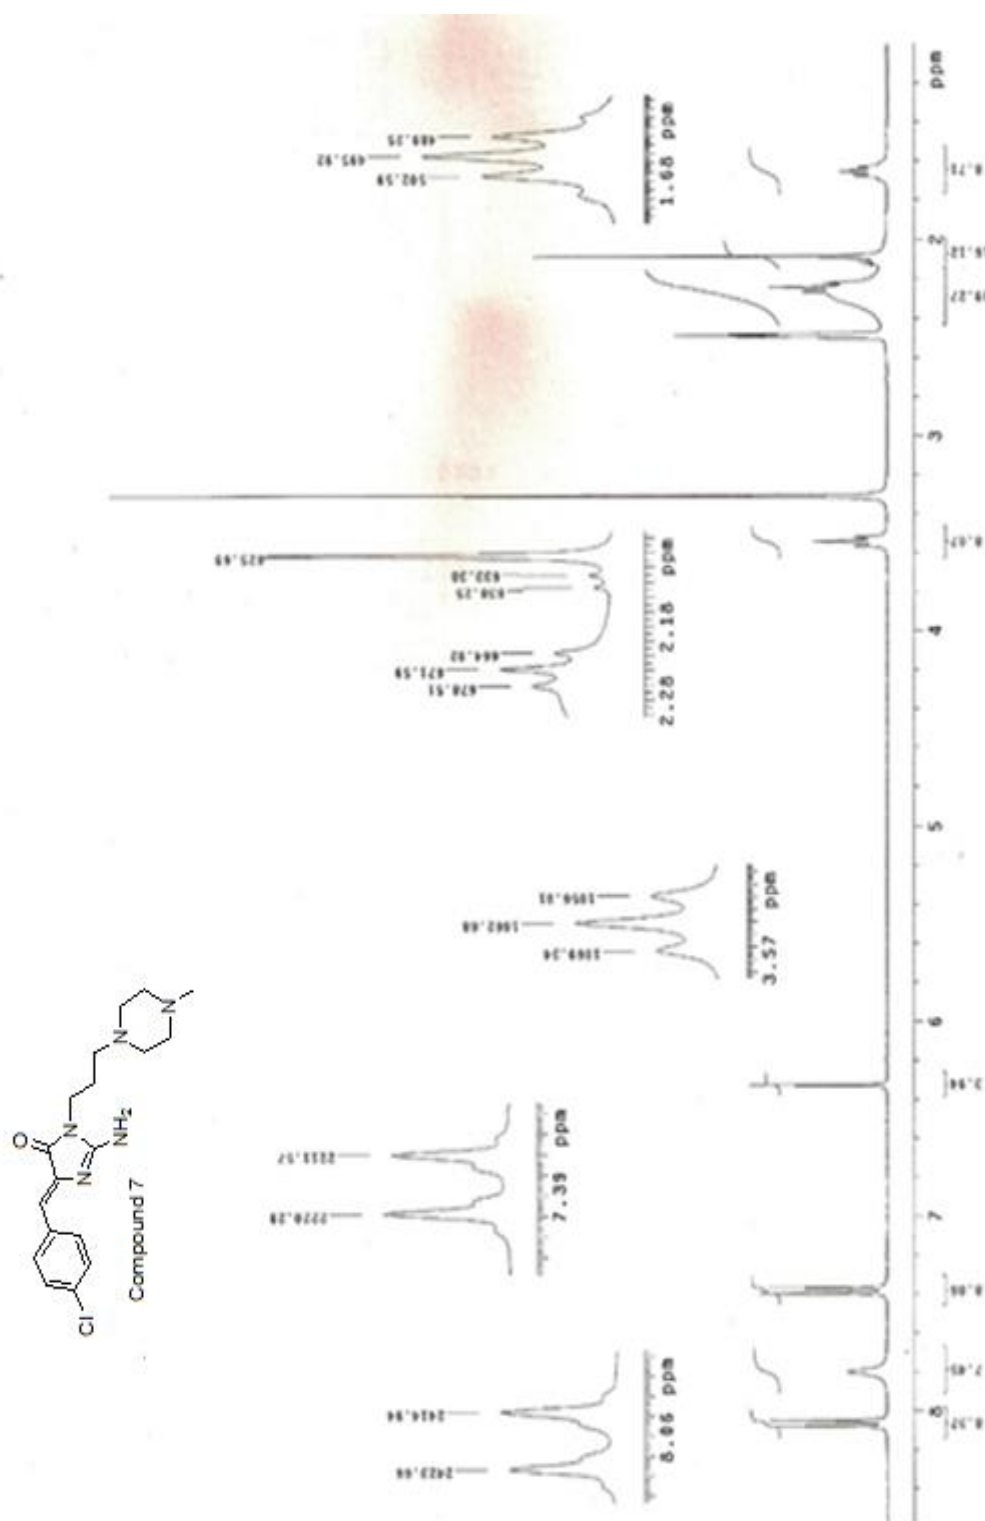

<sup>1</sup>H-NMR for 7 (DMSO-d<sub>6</sub>) δ [ppm]: 1.63 (qu, J=6.67 Hz, 2H, CH<sub>2</sub>-CH<sub>2</sub>-CH<sub>2</sub>), 2.09 (s, 3H, CH<sub>3</sub>), 2.22-2.26 (t def., 10H, Pp, Pp-CH<sub>2</sub>), 3.52 (t, J=6.67 Hz, 2H, N<sub>3</sub>-CH<sub>2</sub>), 6.32(s, 1H, CH=C), 7.36 (d, J=8.72Hz, 2H, Ar-3,5-H), 7.80 (br. s, 2H, NH<sub>2</sub>), 8.05 (d, J=8.72 Hz, 2H, Ar-2,6-H).

**Compound 7 (HCl form)**

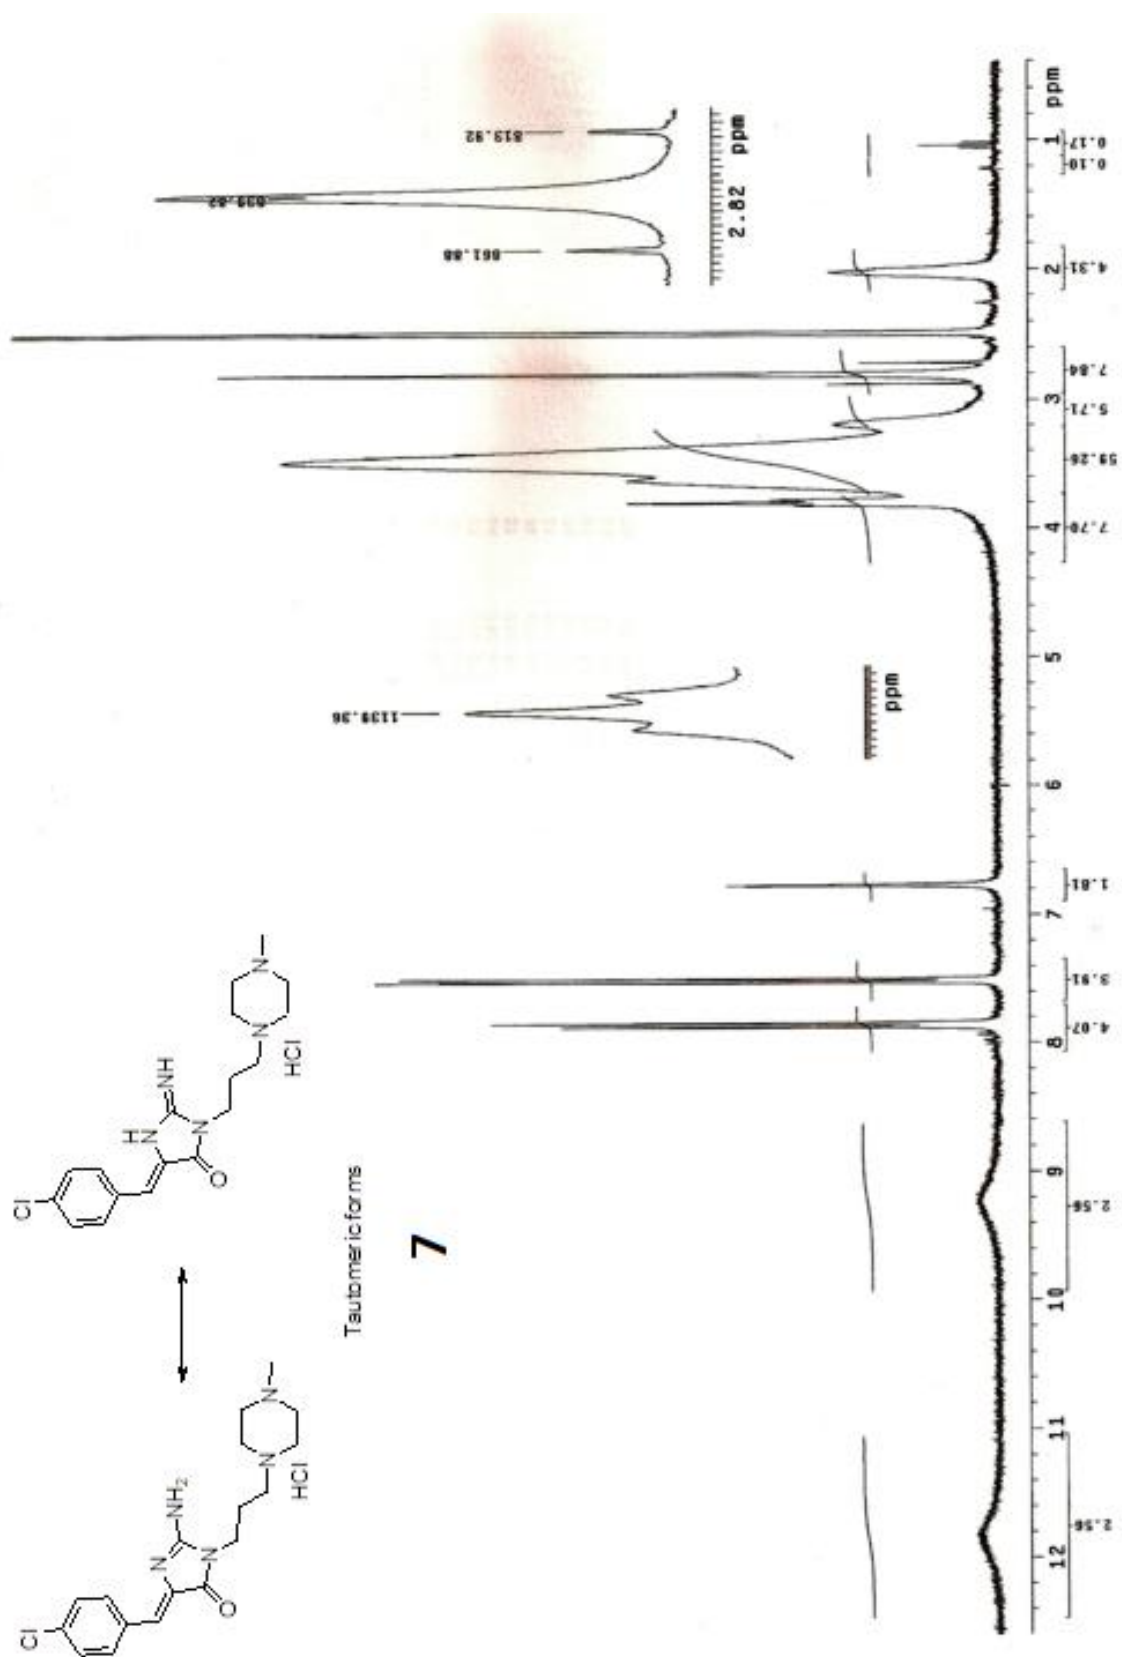

Compound 8 (basic form)

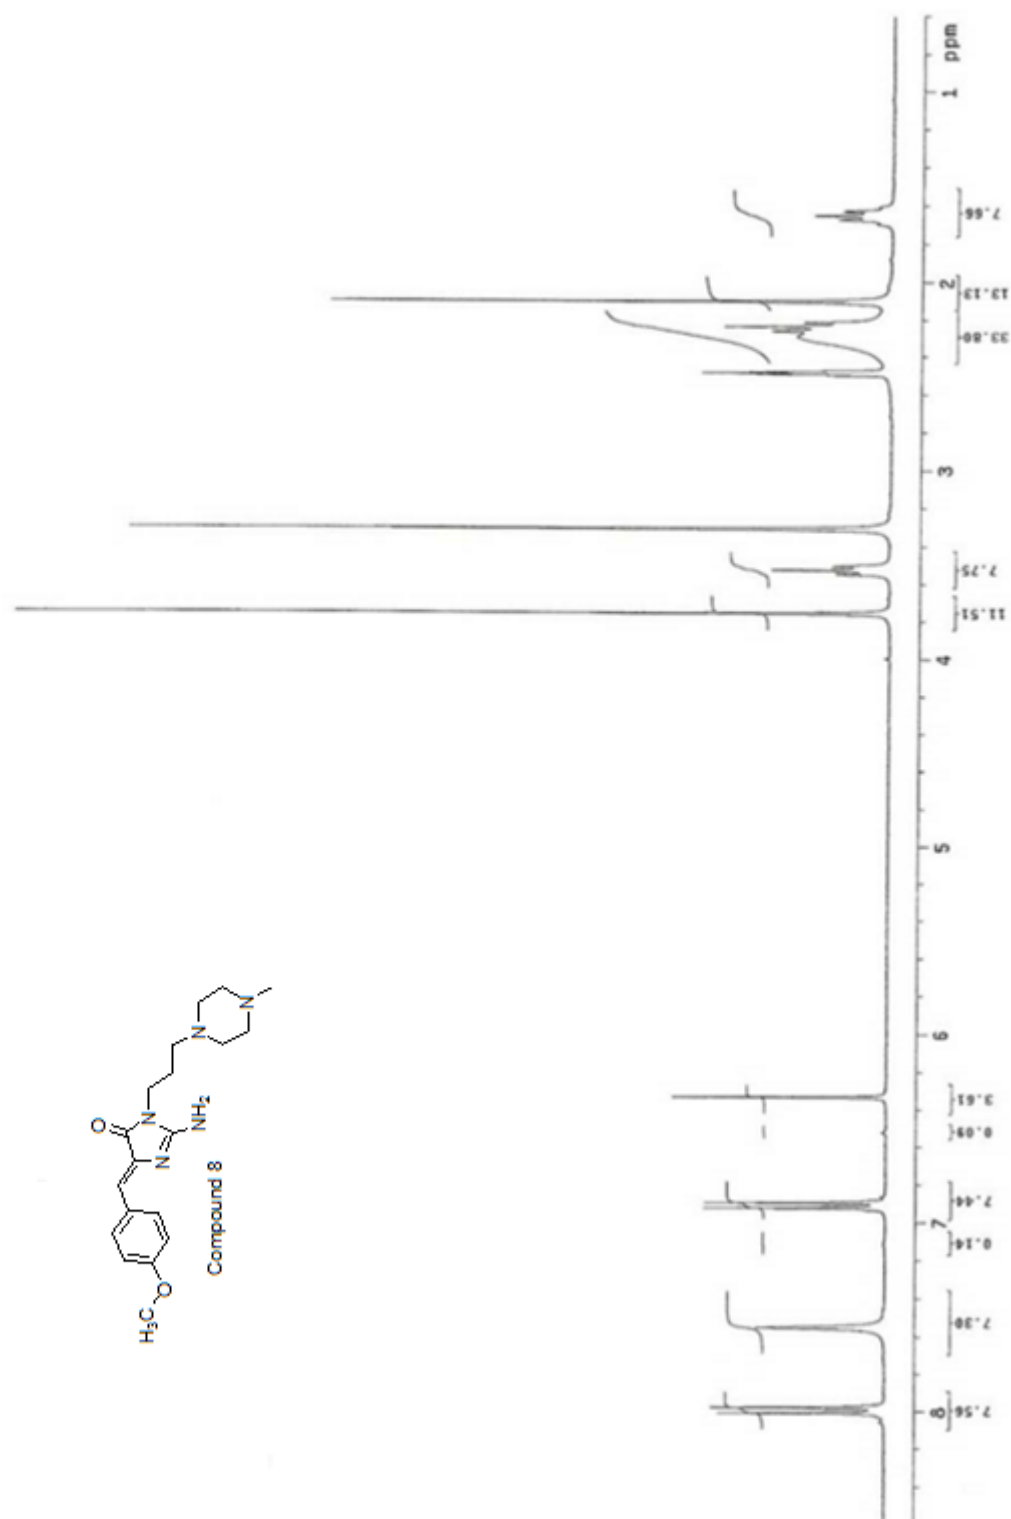

<sup>1</sup>H-NMR for 8 (DMSO-d<sub>6</sub>) δ [ppm]: 1.63 (t, J=6.67 Hz, 2H, CH<sub>2</sub>-CH<sub>2</sub>-CH<sub>2</sub>), 2.10 (s, 3H, N-CH<sub>3</sub>), 2.21-2.40 (m, 8H, Pp, Pp-CH<sub>2</sub>), 3.50 (t, J=6.70 Hz, 2H, N3-CH<sub>2</sub>), 3.76 (s, 3H, OCH<sub>3</sub>), 6.33 (s, 1H, CH=C), 6.89 (d, J=8.98, 2H, Ar-3,5-H), 7.55 (s, 2H, NH<sub>2</sub>), 7.98 (d, J=8.72 Hz, 2H, Ar-2,6-H).

Compound 8 (HCl form)

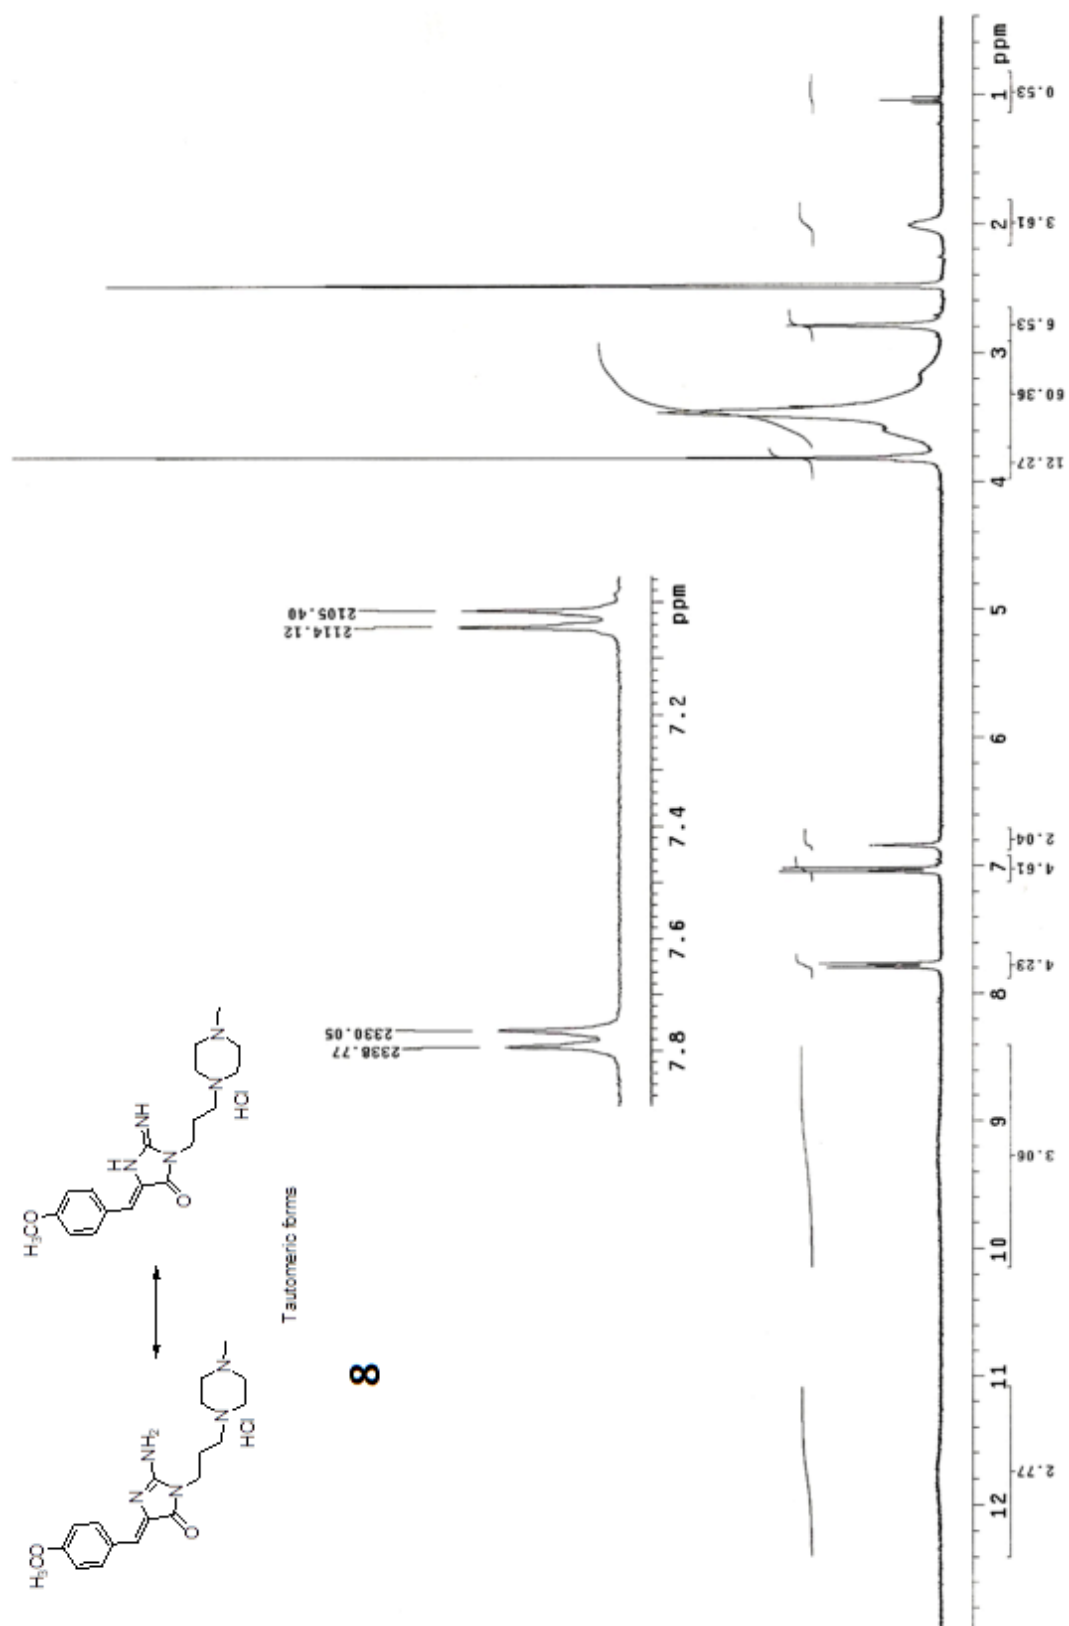

# Compound 9

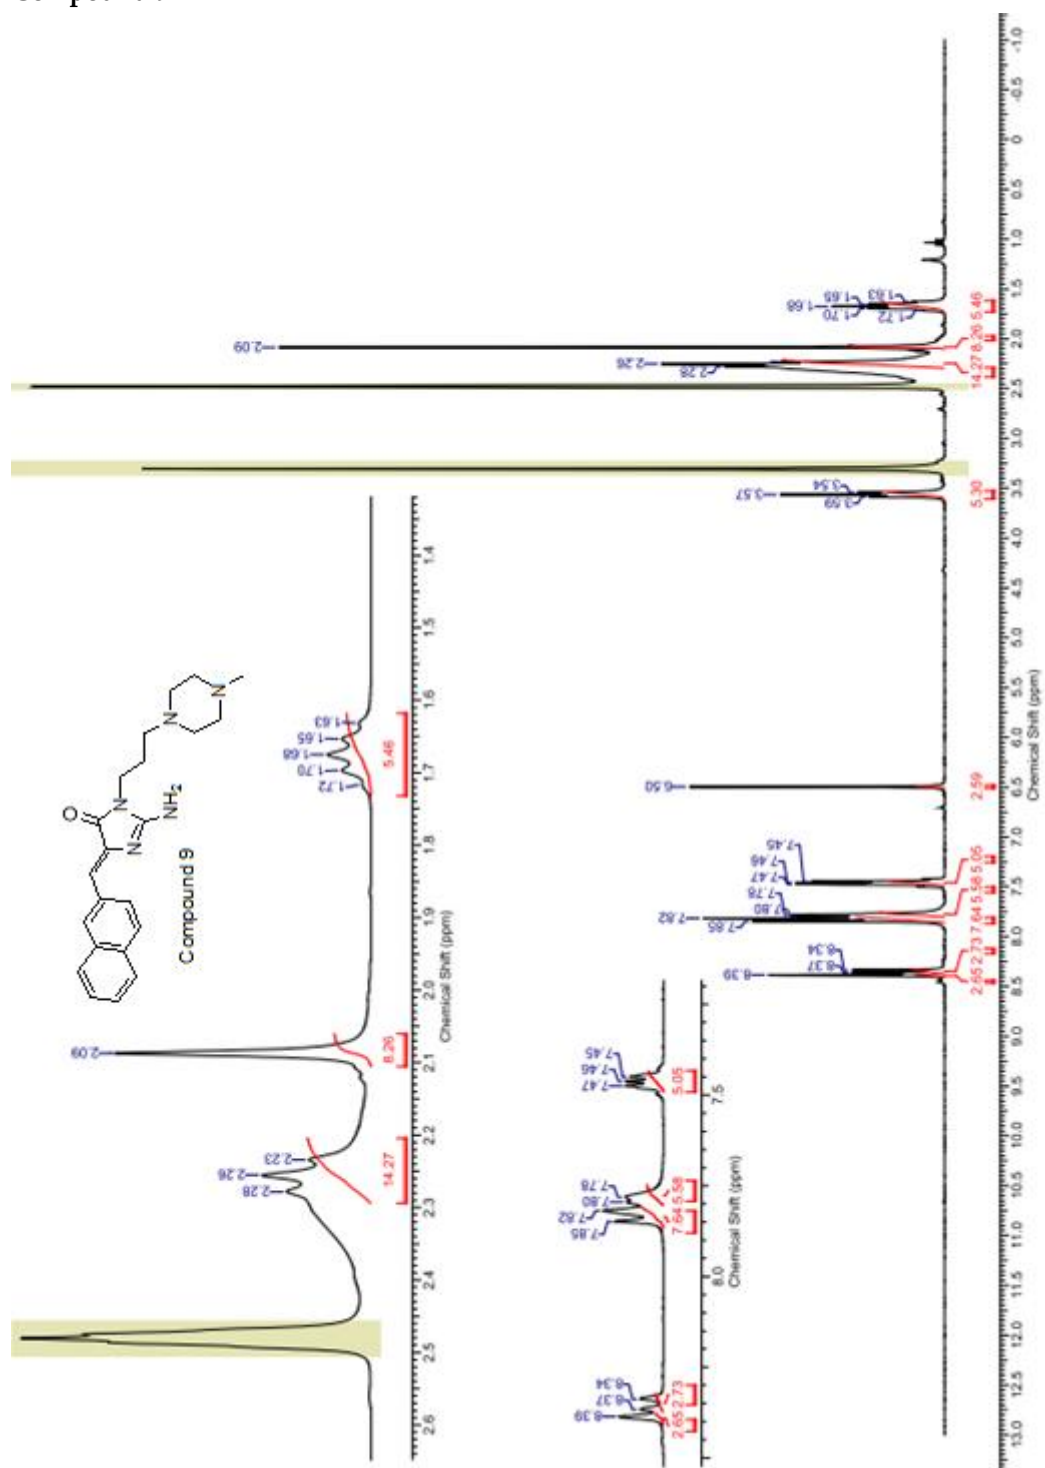

### Compound 10

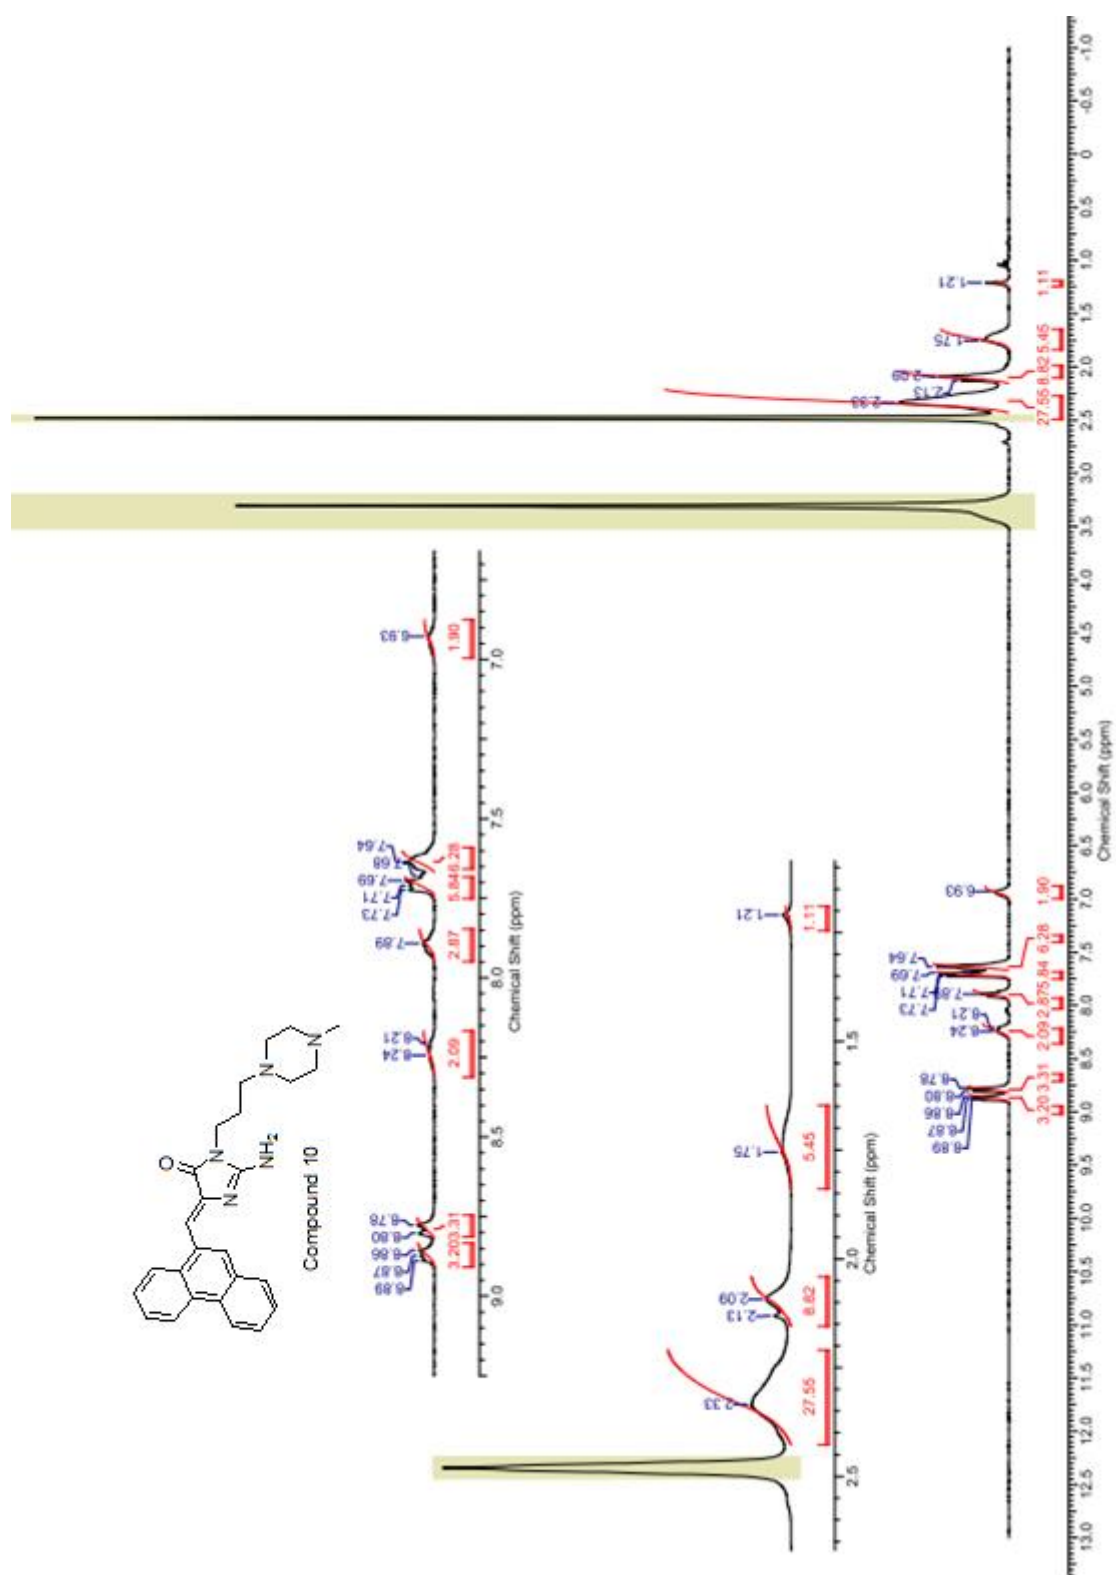

# Compound 11

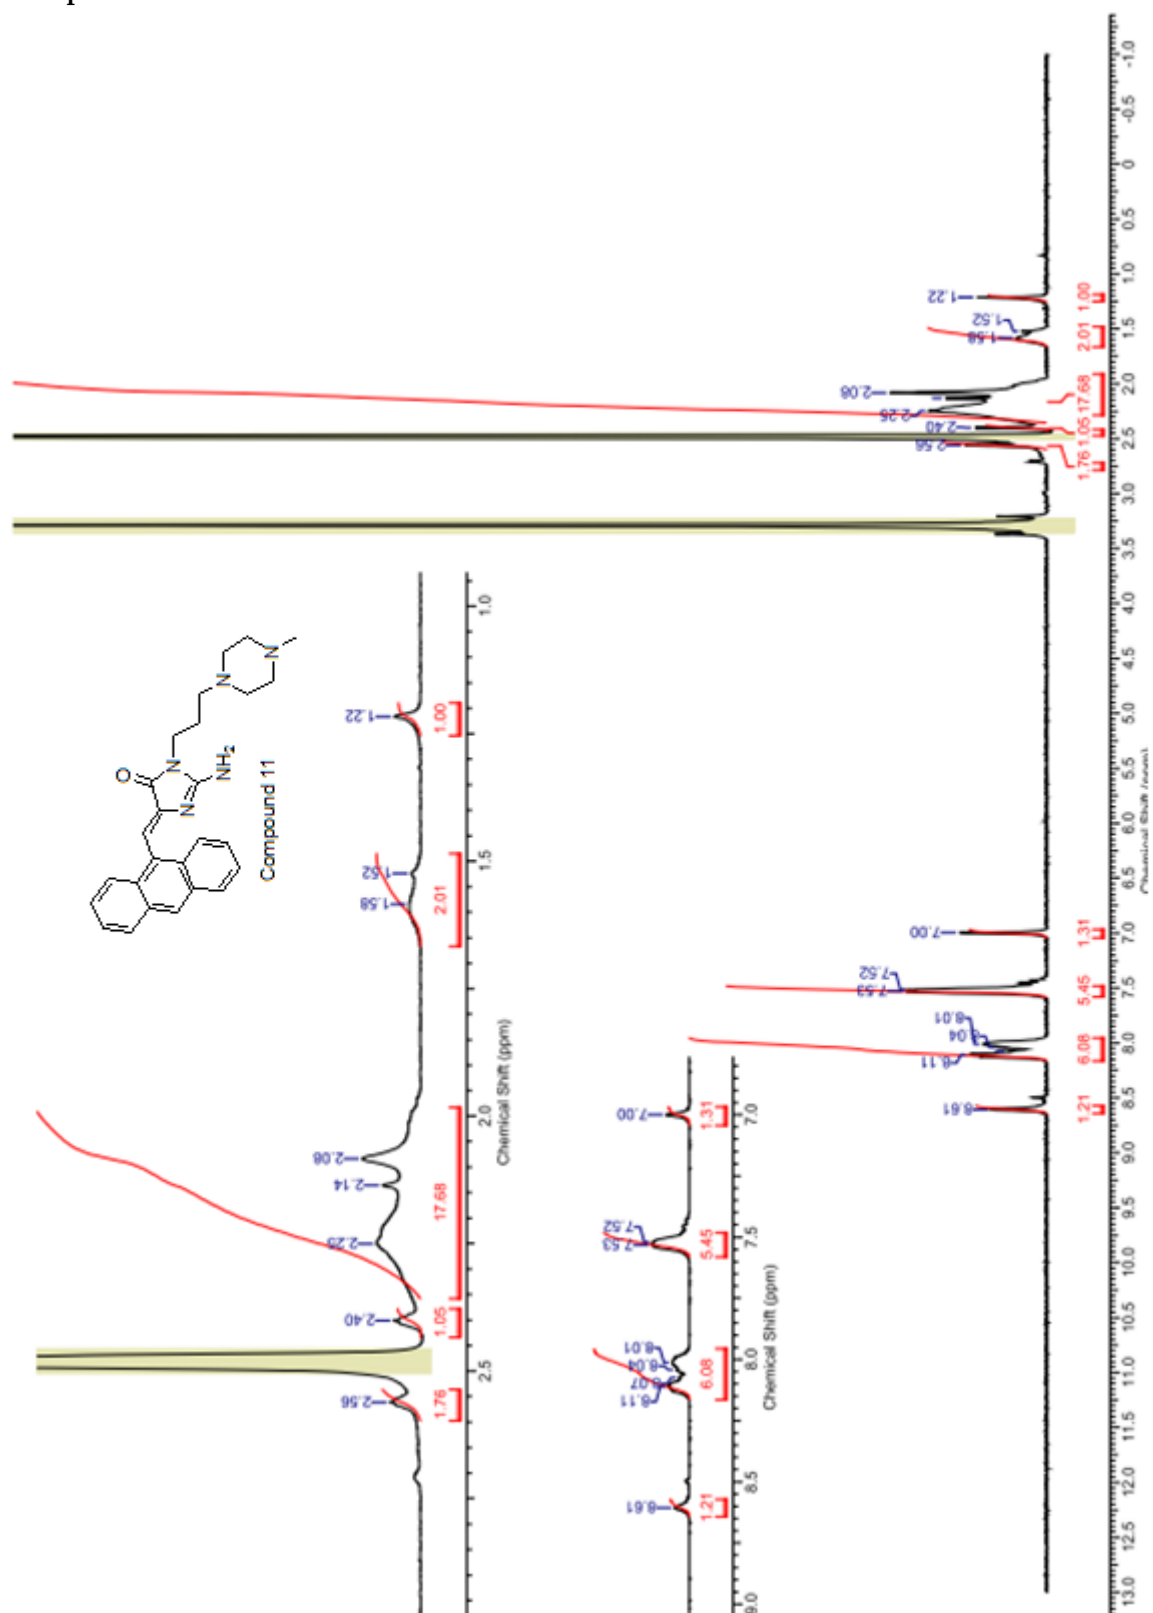



**Compound 12**

CNCCN1C(=O)N=C(c2ccc(Oc3ccc(C)cc3)cc2)N1

**<sup>1</sup>H NMR spectrum (CDCl<sub>3</sub>) of Compound 12:**

| Chemical Shift (ppm)                           | Integration |
|------------------------------------------------|-------------|
| 7.82, 7.77, 7.75                               | 0.77        |
| 7.62, 7.60, 7.57                               | 4.87        |
| 7.46, 7.43, 7.41, 7.38, 7.36                   | 7.97        |
| 7.15, 7.13, 7.10                               | 2.66        |
| 6.95, 6.96, 7.01                               | 6.45        |
| 6.72                                           | 1.19        |
| 3.75                                           | 3.75        |
| 3.14                                           | 3.14        |
| 2.79                                           | 2.79        |
| 1.99                                           | 1.99        |
| 7.82, 7.97, 6.45, 1.19                         | 4.87        |
| 7.62, 7.60, 7.57, 7.46, 7.43, 7.41, 7.38, 7.36 | 7.97        |
| 7.15, 7.13, 7.10, 6.95, 6.96, 7.01             | 6.45        |
| 6.72                                           | 1.19        |
| 3.75                                           | 3.75        |
| 3.14                                           | 3.14        |
| 2.79                                           | 2.79        |
| 1.99                                           | 1.99        |
| 7.82, 7.97, 6.45, 1.19                         | 4.87        |
| 7.62, 7.60, 7.57, 7.46, 7.43, 7.41, 7.38, 7.36 | 7.97        |
| 7.15, 7.13, 7.10, 6.95, 6.96, 7.01             | 6.45        |
| 6.72                                           | 1.19        |
| 3.75                                           | 3.75        |
| 3.14                                           | 3.14        |
| 2.79                                           | 2.79        |
| 1.99                                           | 1.99        |
| 7.82, 7.97, 6.45, 1.19                         | 4.87        |
| 7.62, 7.60, 7.57, 7.46, 7.43, 7.41, 7.38, 7.36 | 7.97        |
| 7.15, 7.13, 7.10, 6.95, 6.96, 7.01             | 6.45        |
| 6.72                                           | 1.19        |
| 3.75                                           | 3.75        |
| 3.14                                           | 3.14        |
| 2.79                                           | 2.79        |
| 1.99                                           | 1.99        |
| 7.82, 7.97, 6.45, 1.19                         | 4.87        |
| 7.62, 7.60, 7.57, 7.46, 7.43, 7.41, 7.38, 7.36 | 7.97        |
| 7.15, 7.13, 7.10, 6.95, 6.96, 7.01             | 6.45        |
| 6.72                                           | 1.19        |
| 3.75                                           | 3.75        |
| 3.14                                           | 3.14        |
| 2.79                                           | 2.79        |
| 1.99                                           | 1.99        |
| 7.82, 7.97, 6.45, 1.19                         | 4.87        |
| 7.62, 7.60, 7.57, 7.46, 7.43, 7.41, 7.38, 7.36 | 7.97        |
| 7.15, 7.13, 7.10, 6.95, 6.96, 7.01             | 6.45        |
| 6.72                                           | 1.19        |
| 3.75                                           | 3.75        |
| 3.14                                           | 3.14        |
| 2.79                                           | 2.79        |
| 1.99                                           | 1.99        |
| 7.82, 7.97, 6.45, 1.19                         | 4.87        |
| 7.62, 7.60, 7.57, 7.46, 7.43, 7.41, 7.38, 7.36 | 7.97        |
| 7.15, 7.13, 7.10, 6.95, 6.96, 7.01             | 6.45        |
| 6.72                                           | 1.19        |
| 3.75                                           | 3.75        |
| 3.14                                           | 3.14        |
| 2.79                                           | 2.79        |
| 1.99                                           | 1.99        |
| 7.82, 7.97, 6.45, 1.19                         | 4.87        |
| 7.62, 7.60, 7.57, 7.46, 7.43, 7.41, 7.38, 7.36 | 7.97        |
| 7.15, 7.13, 7.10, 6.95, 6.96, 7.01             | 6.45        |
| 6.72                                           | 1.19        |
| 3.75                                           | 3.75        |
| 3.14                                           | 3.14        |
| 2.79                                           | 2.79        |
| 1.99                                           | 1.99        |
| 7.82, 7.97, 6.45, 1.19                         | 4.87        |
| 7.62, 7.60, 7.57, 7.46, 7.43, 7.41, 7.38, 7.36 | 7.97        |
| 7.15, 7.13, 7.10, 6.95, 6.96, 7.01             | 6.45        |
| 6.72                                           | 1.19        |
| 3.75                                           | 3.75        |
| 3.14                                           | 3.14        |
| 2.79                                           | 2.79        |
| 1.99                                           | 1.99        |
| 7.82, 7.97, 6.45, 1.19                         | 4.87        |
| 7.62, 7.60, 7.57, 7.46, 7.43, 7.41, 7.38, 7.36 | 7.97        |
| 7.15, 7.13, 7.10, 6.95, 6.96, 7.01             | 6.45        |
| 6.72                                           | 1.19        |
| 3.75                                           | 3.75        |
| 3.14                                           | 3.14        |
| 2.79                                           | 2.79        |
| 1.99                                           | 1.99        |
| 7.82, 7.97, 6.45, 1.19                         | 4.87        |
| 7.62, 7.60, 7.57, 7.46, 7.43, 7.41, 7.38, 7.36 | 7.97        |
| 7.15, 7.13, 7.10, 6.95, 6.96, 7.01             | 6.45        |
| 6.72                                           | 1.19        |
| 3.75                                           | 3.75        |
| 3.14                                           | 3.14        |
| 2.79                                           | 2.79        |
| 1.99                                           | 1.99        |
| 7.82, 7.97, 6.45, 1.19                         | 4.87        |
| 7.62, 7.60, 7.57, 7.46, 7.43, 7.41, 7.38, 7.36 | 7.97        |
| 7.15, 7.13, 7.10, 6.95, 6.96, 7.01             | 6.45        |
| 6.72                                           | 1.19        |
| 3.75                                           | 3.75        |
| 3.14                                           | 3.14        |
| 2.79                                           | 2.79        |
| 1.99                                           | 1.99        |
| 7.82, 7.97, 6.45, 1.19                         | 4.87        |
| 7.62, 7.60, 7.57, 7.46, 7.43, 7.41, 7.38, 7.36 | 7.97        |
| 7.15,                                          |             |

# Compound 13

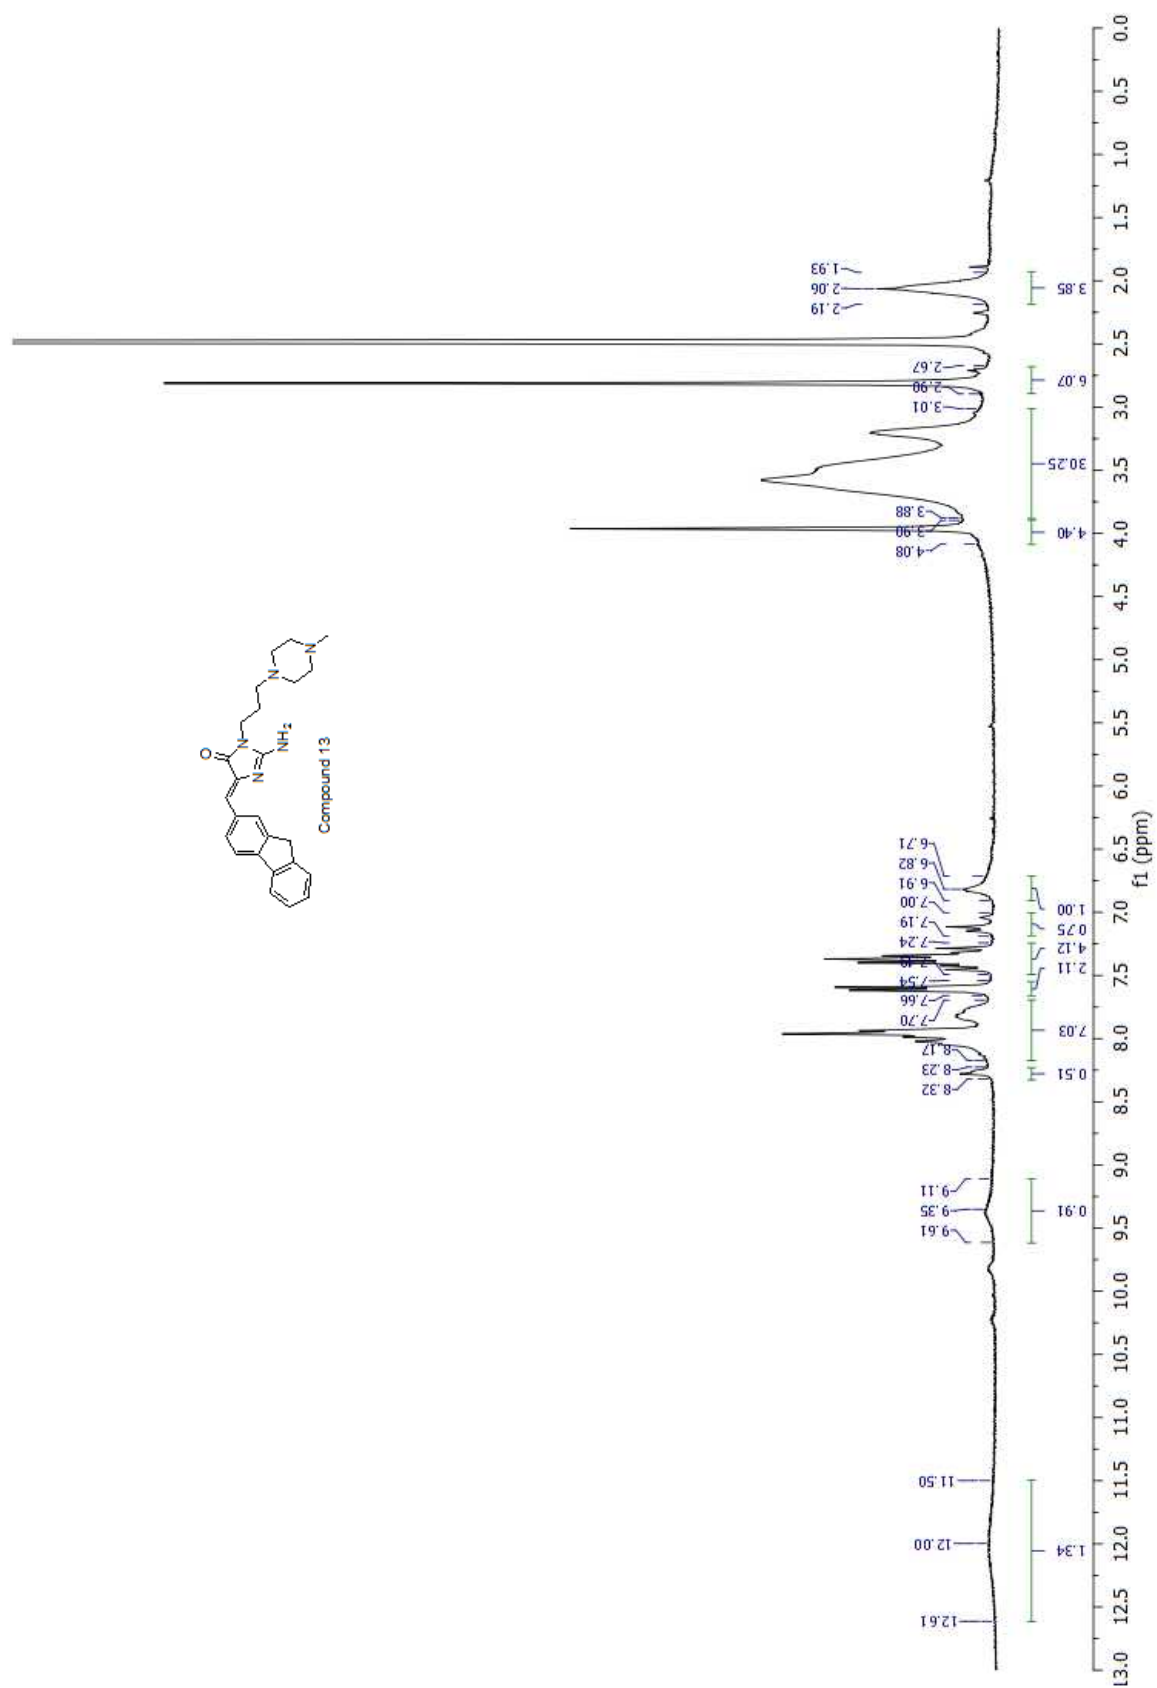

# Compound 14

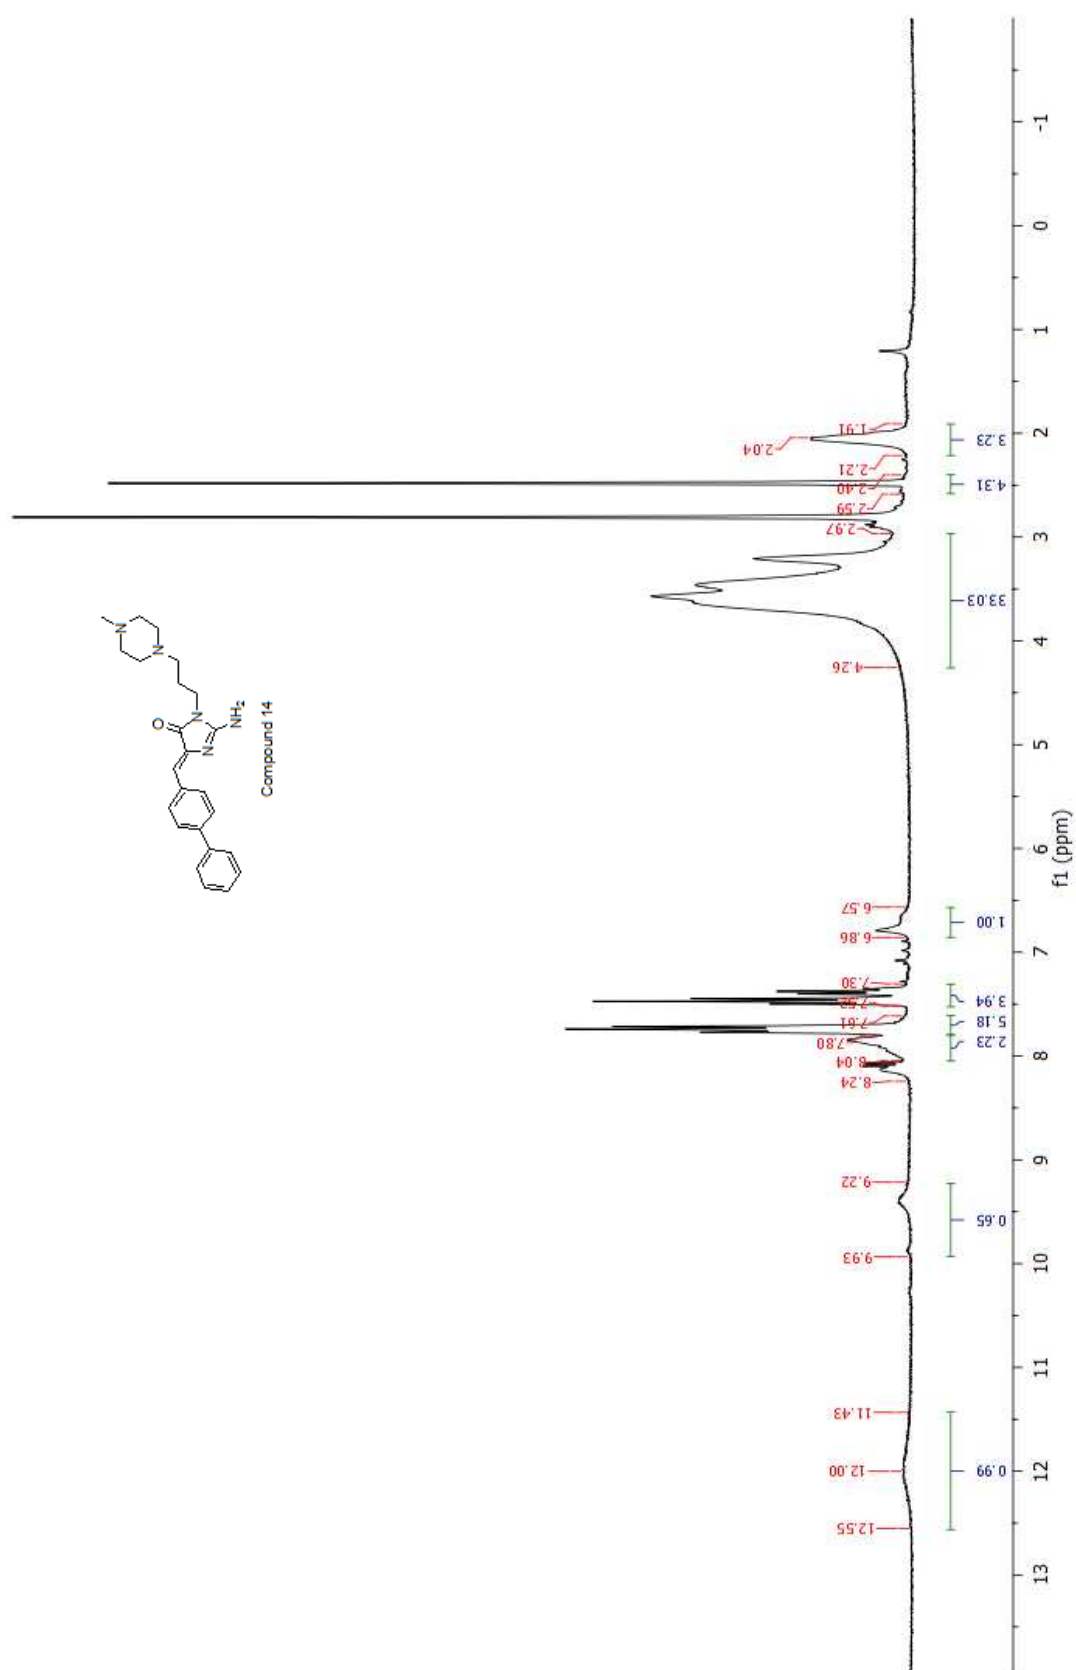

# Compound 15

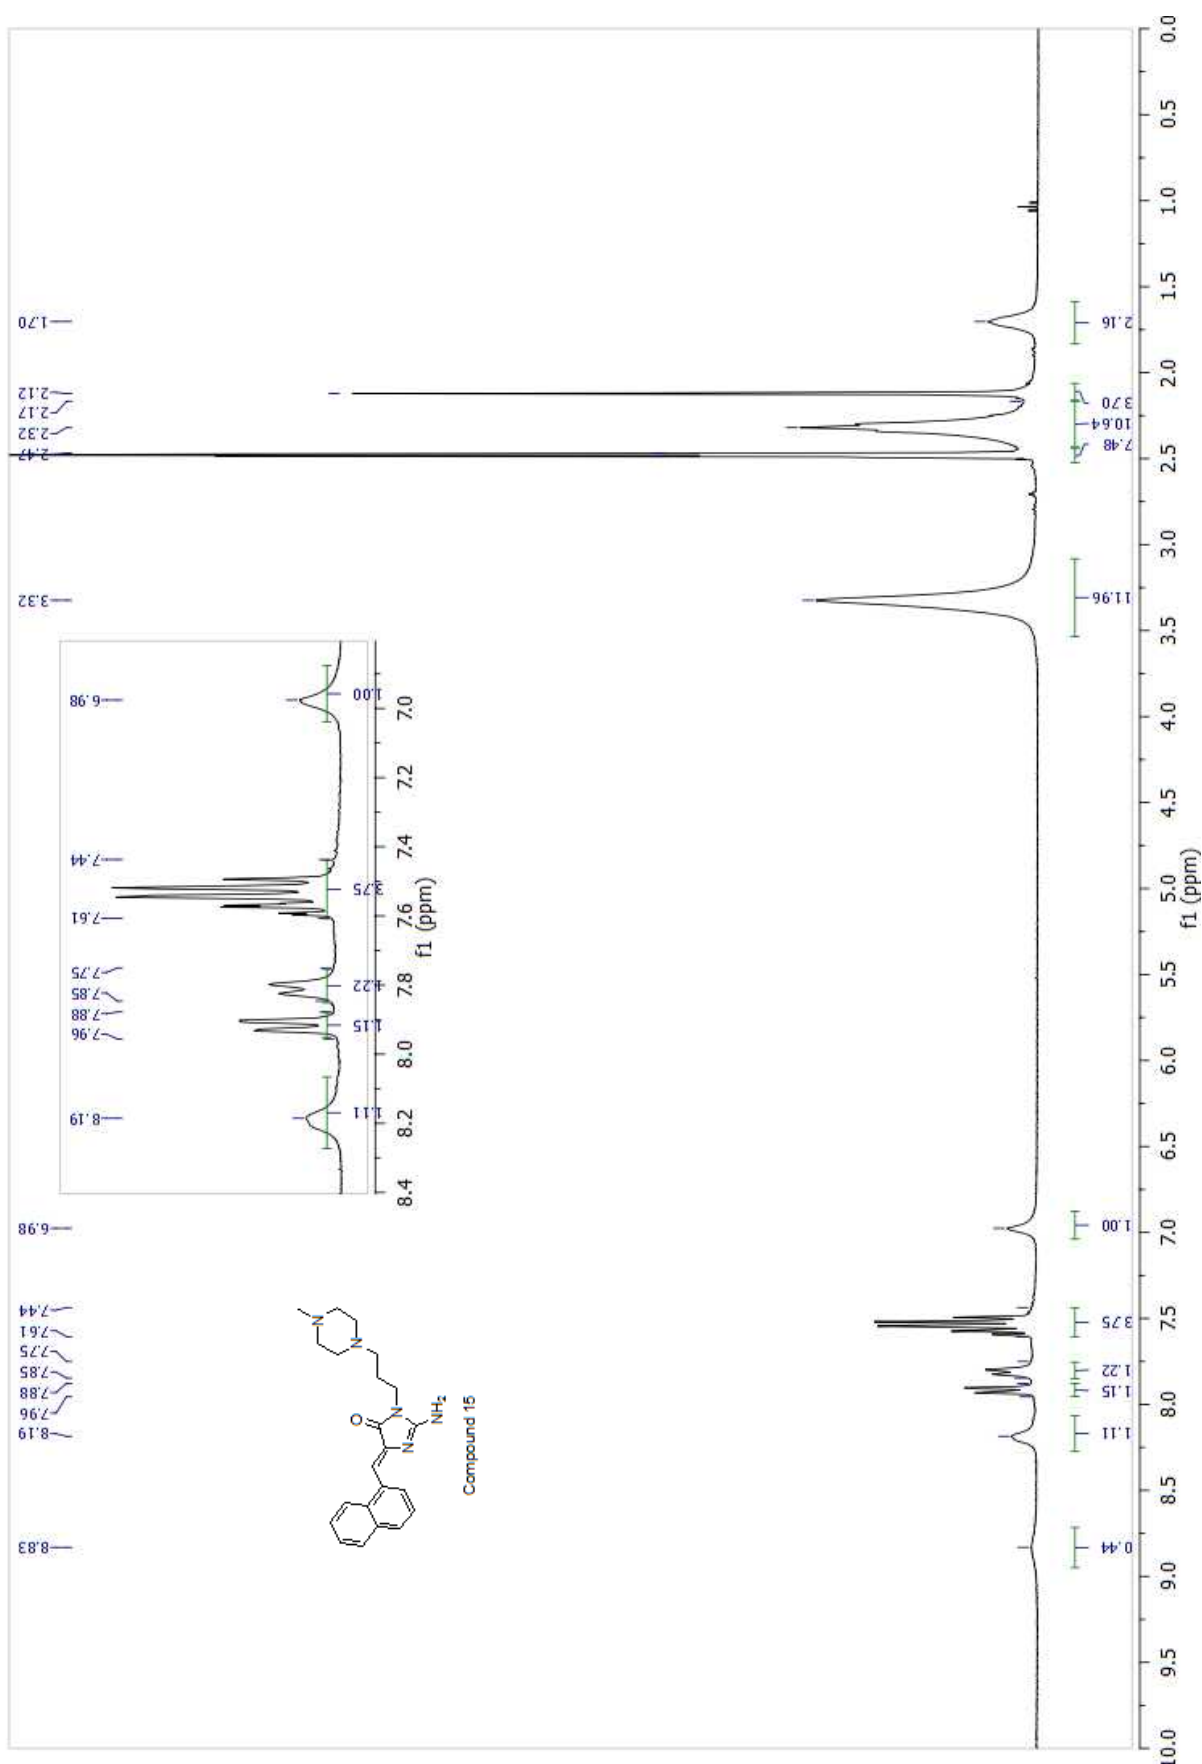

# Compound 16

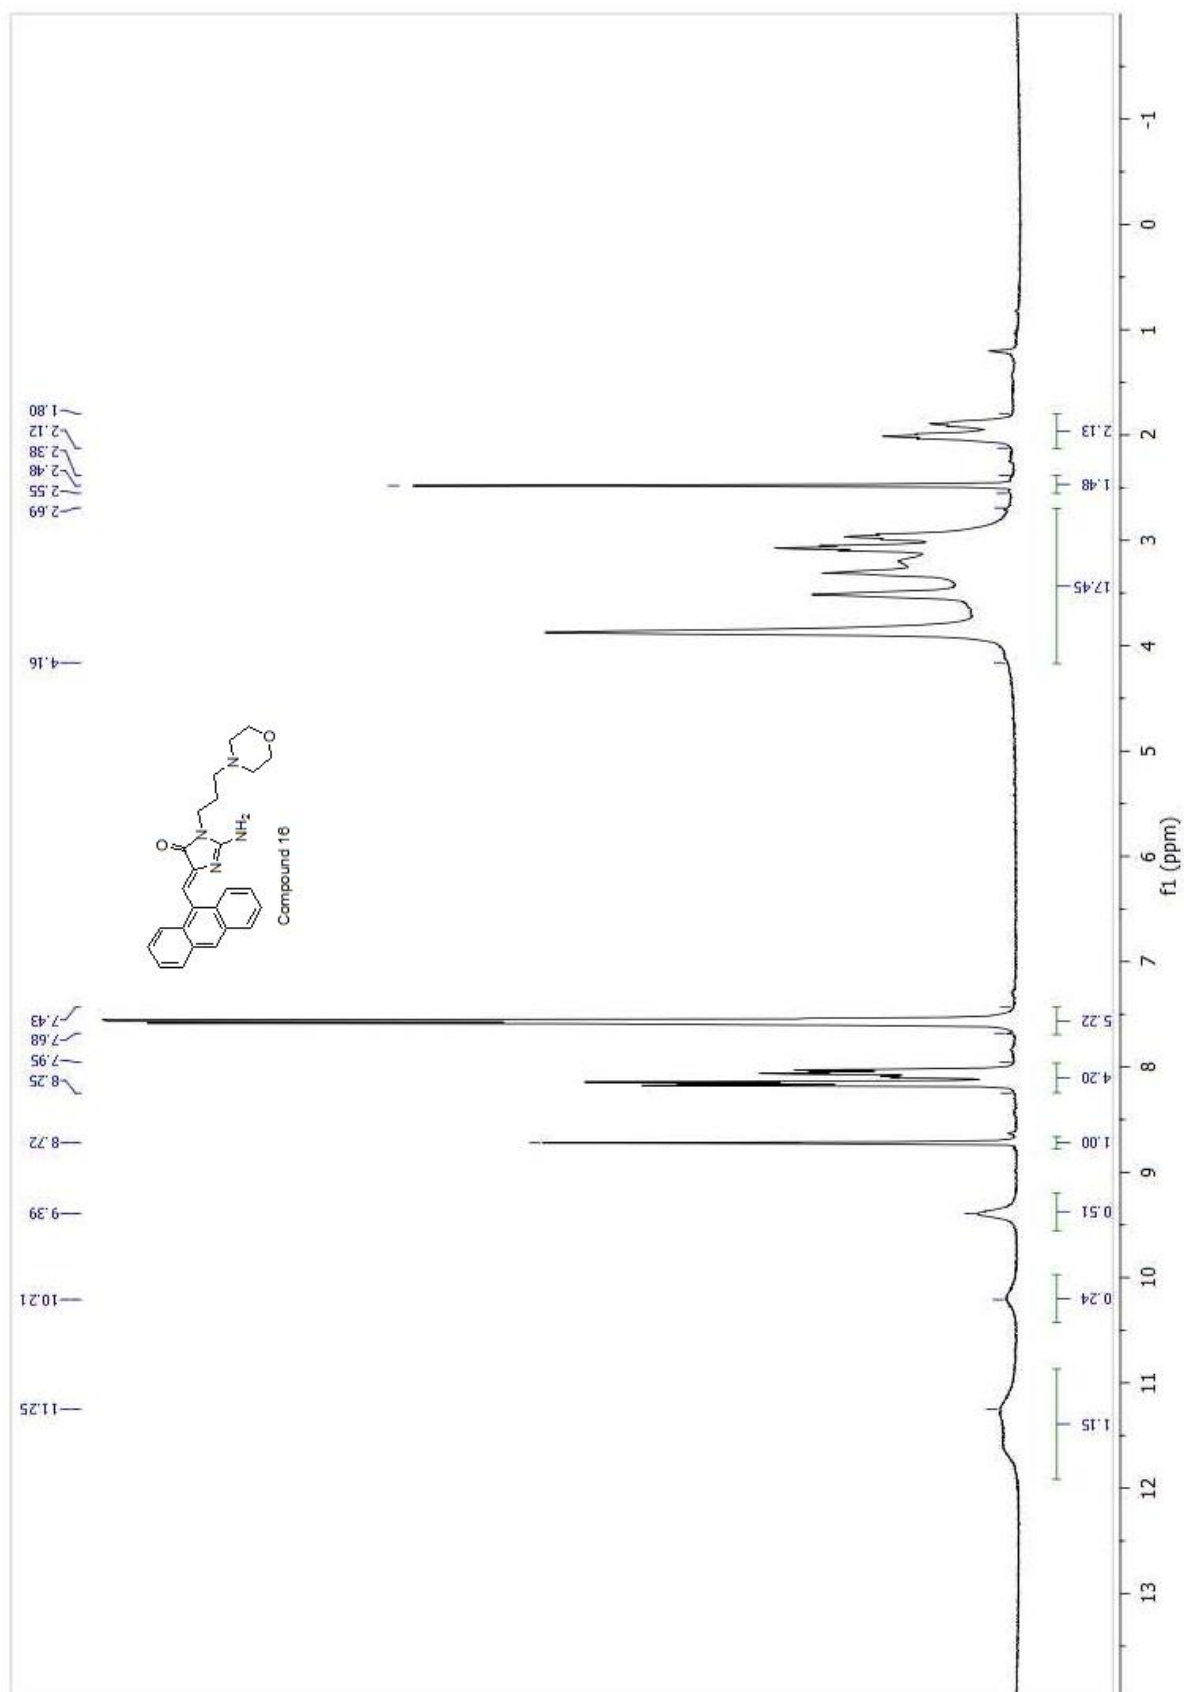

# Compound 17

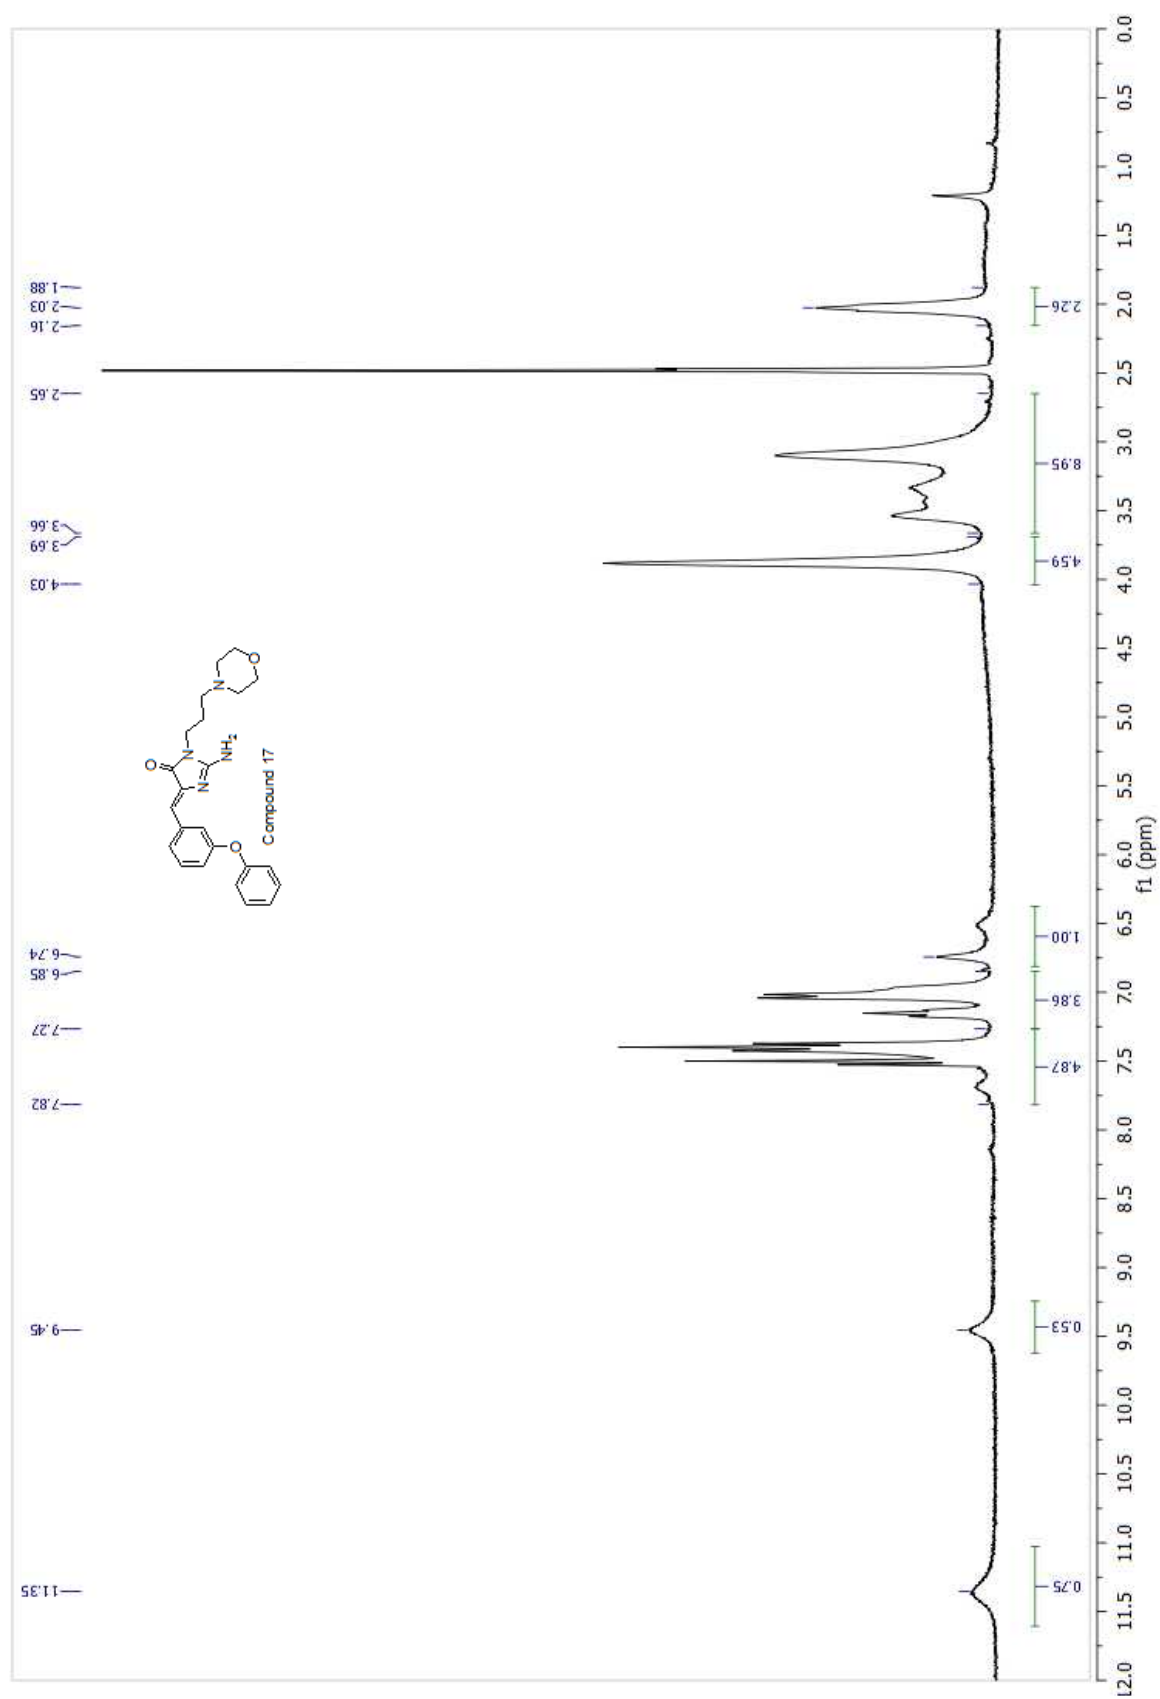

# Compound 21

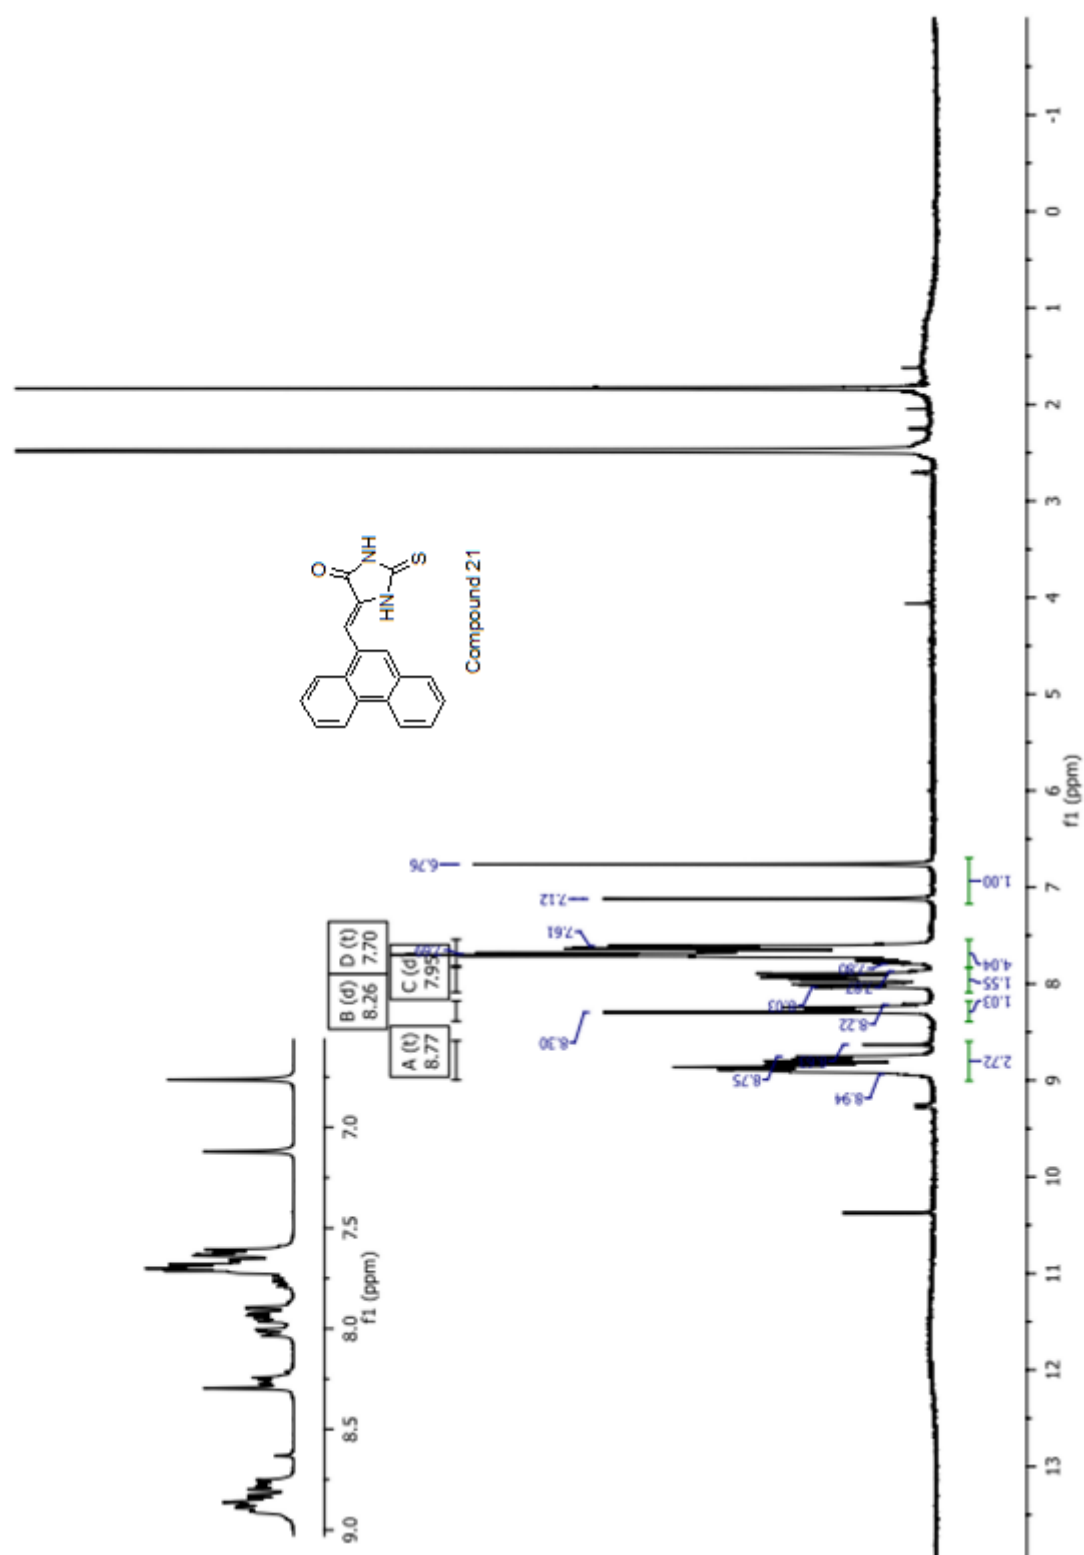

# Compound 23

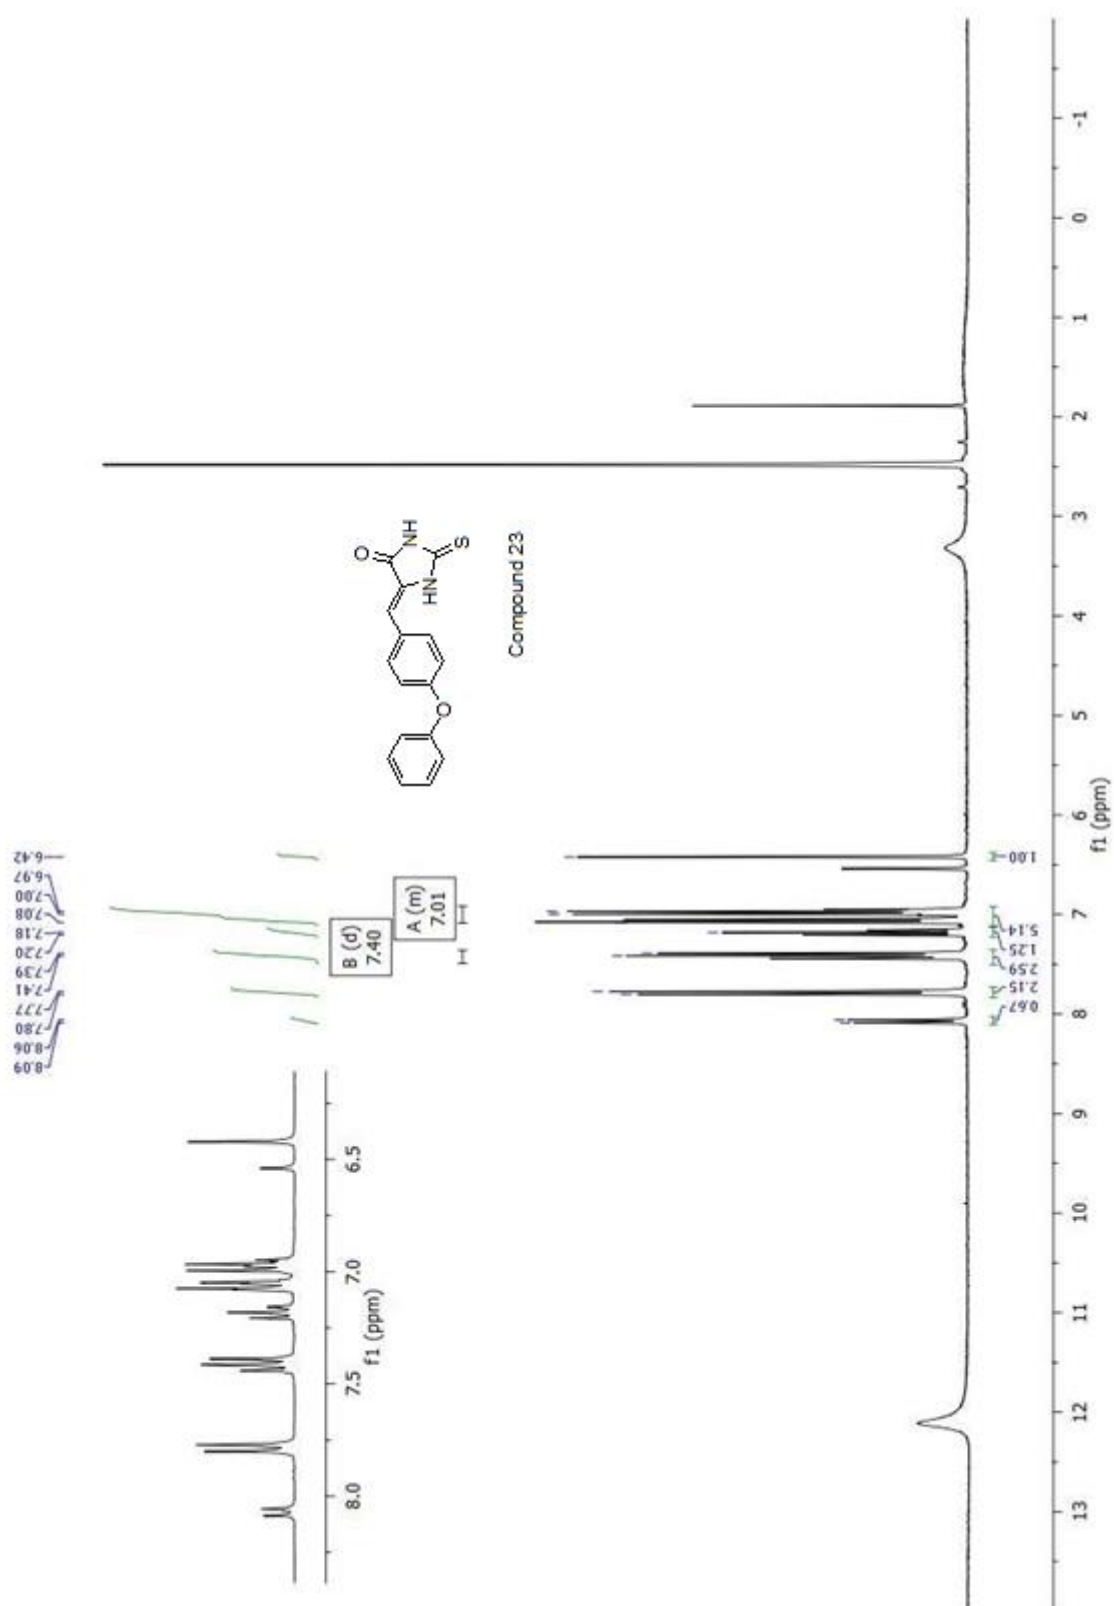



Compound 31

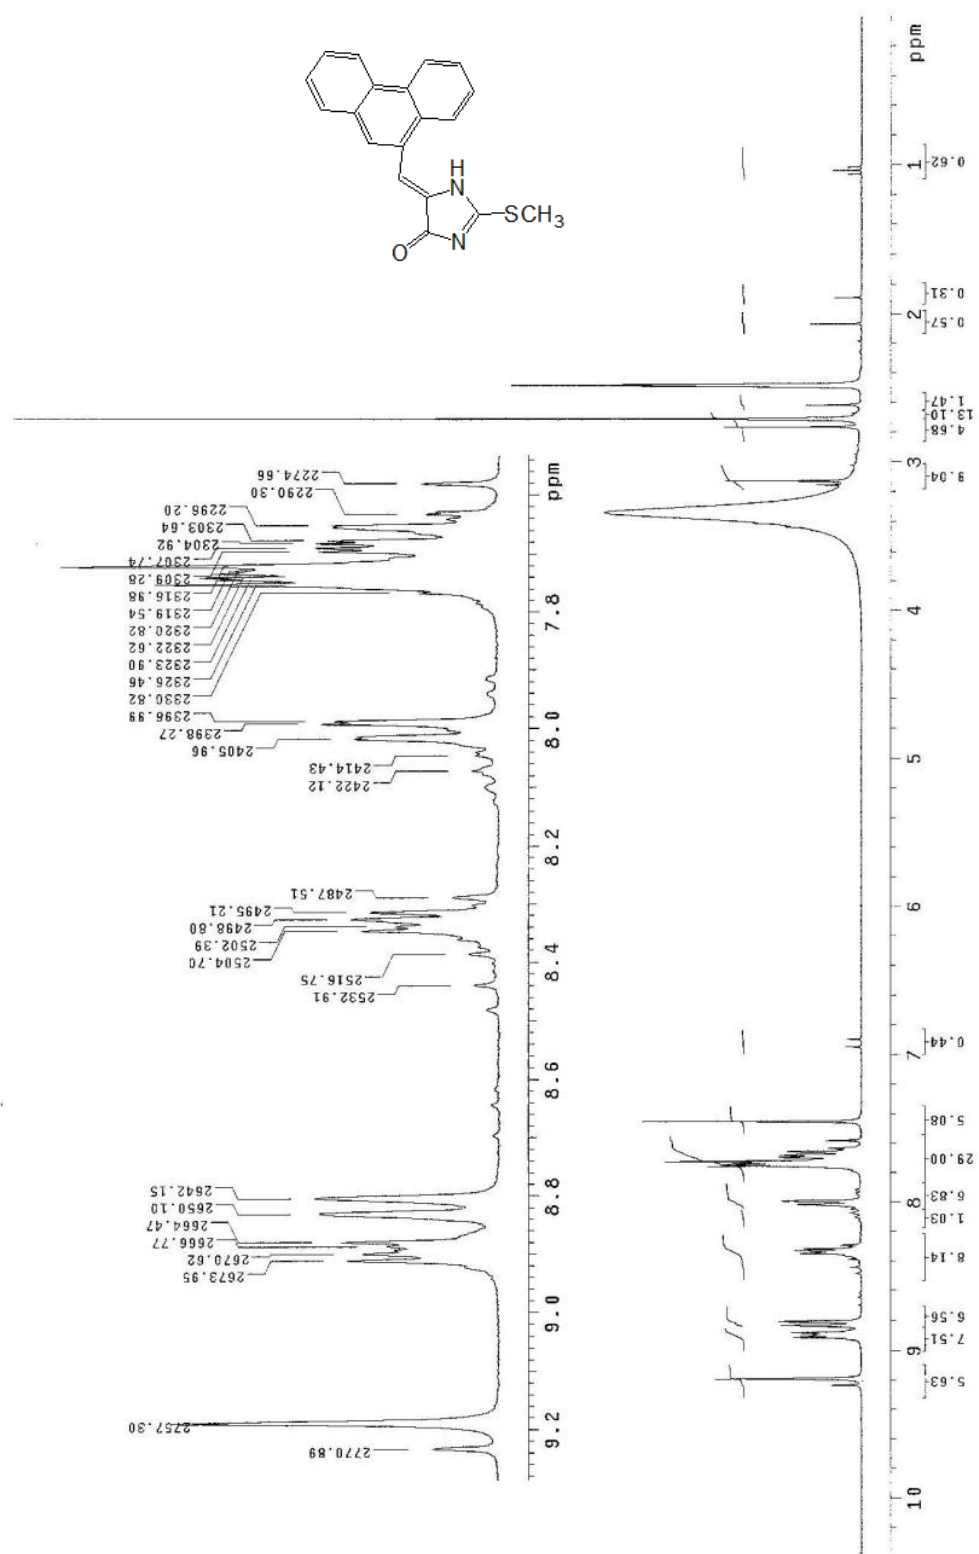

Compound 33

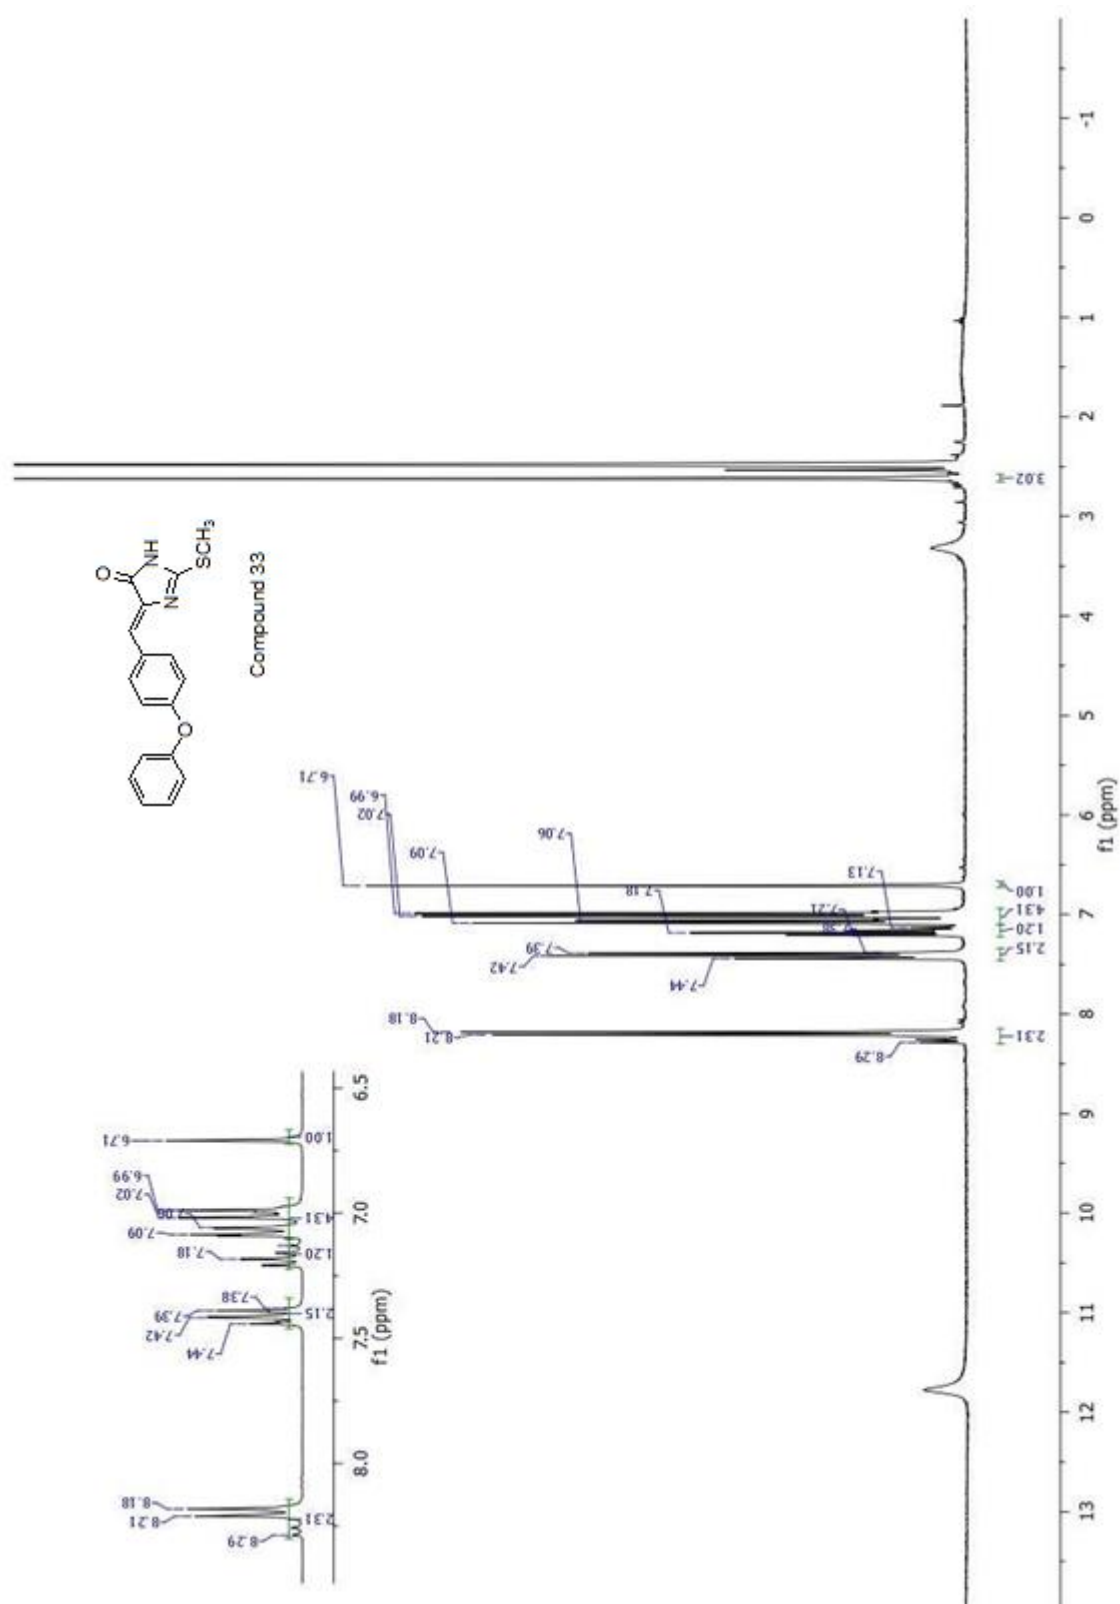

# Compound 34

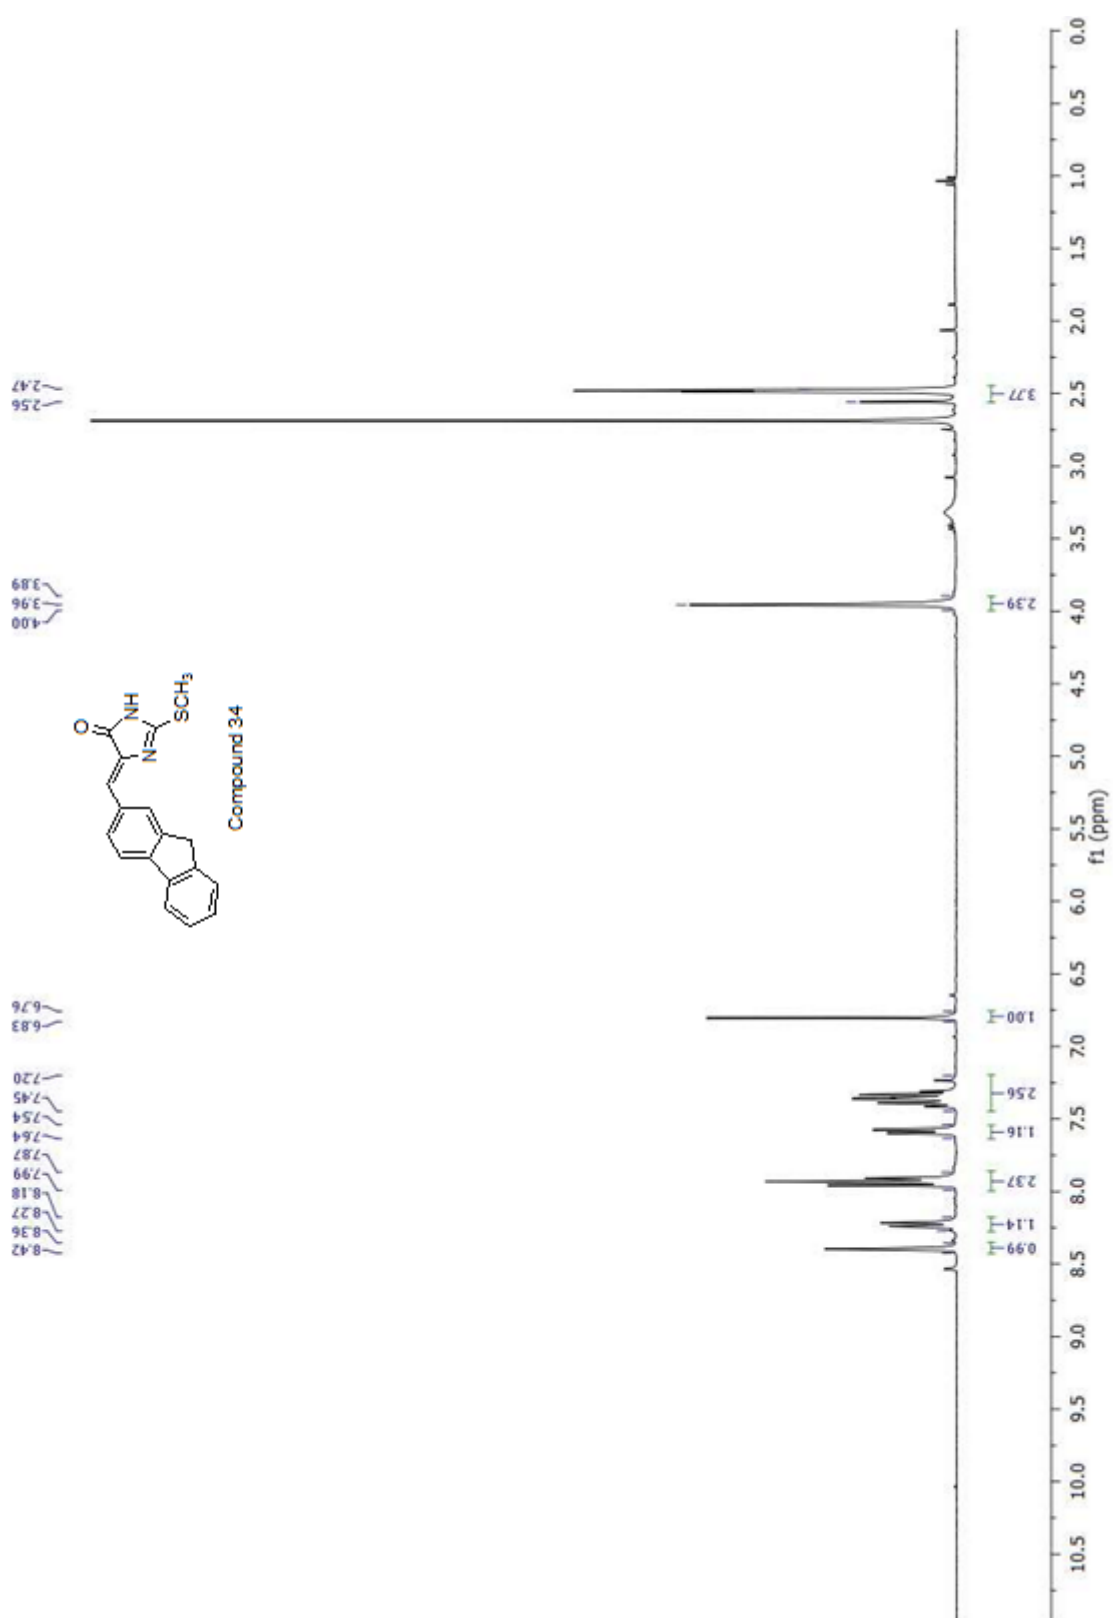

# Compound 37

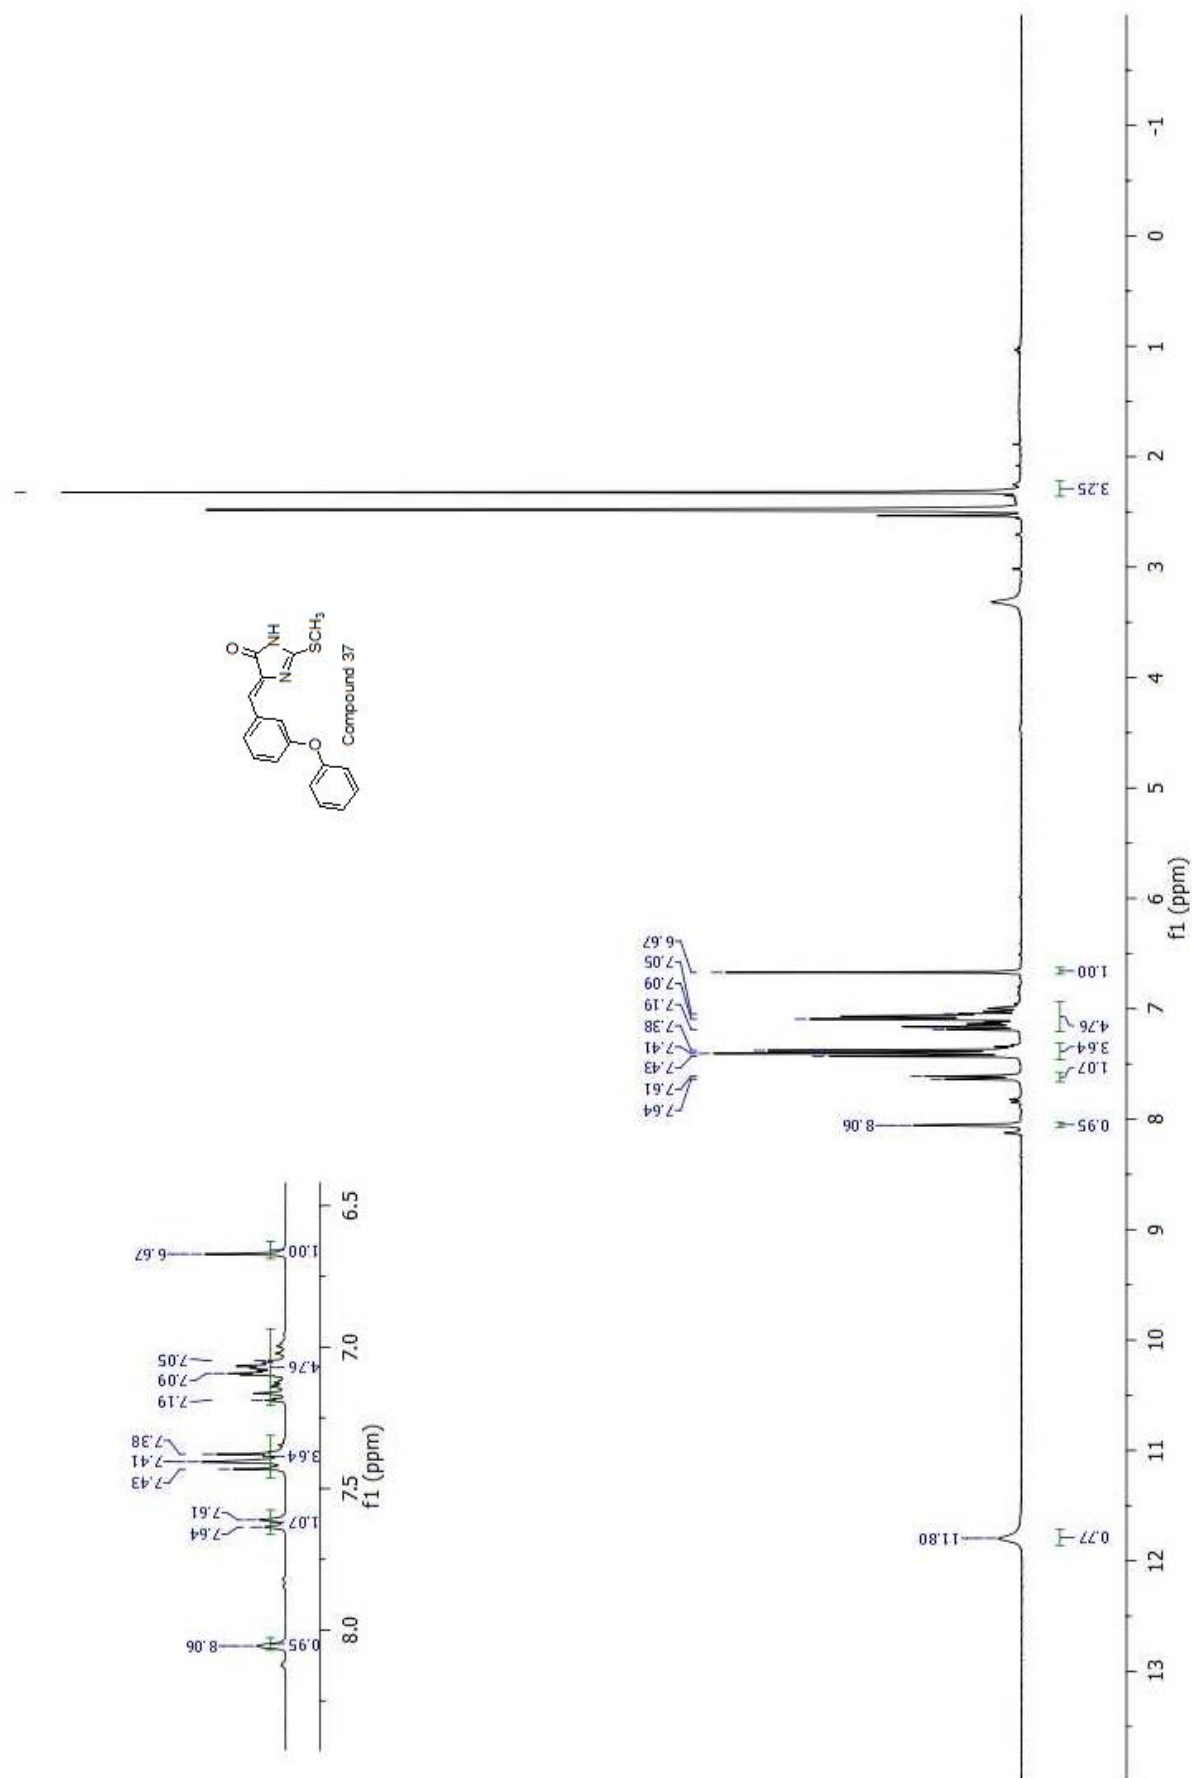

## 13 C NMRs of selected compounds

### Compound 12

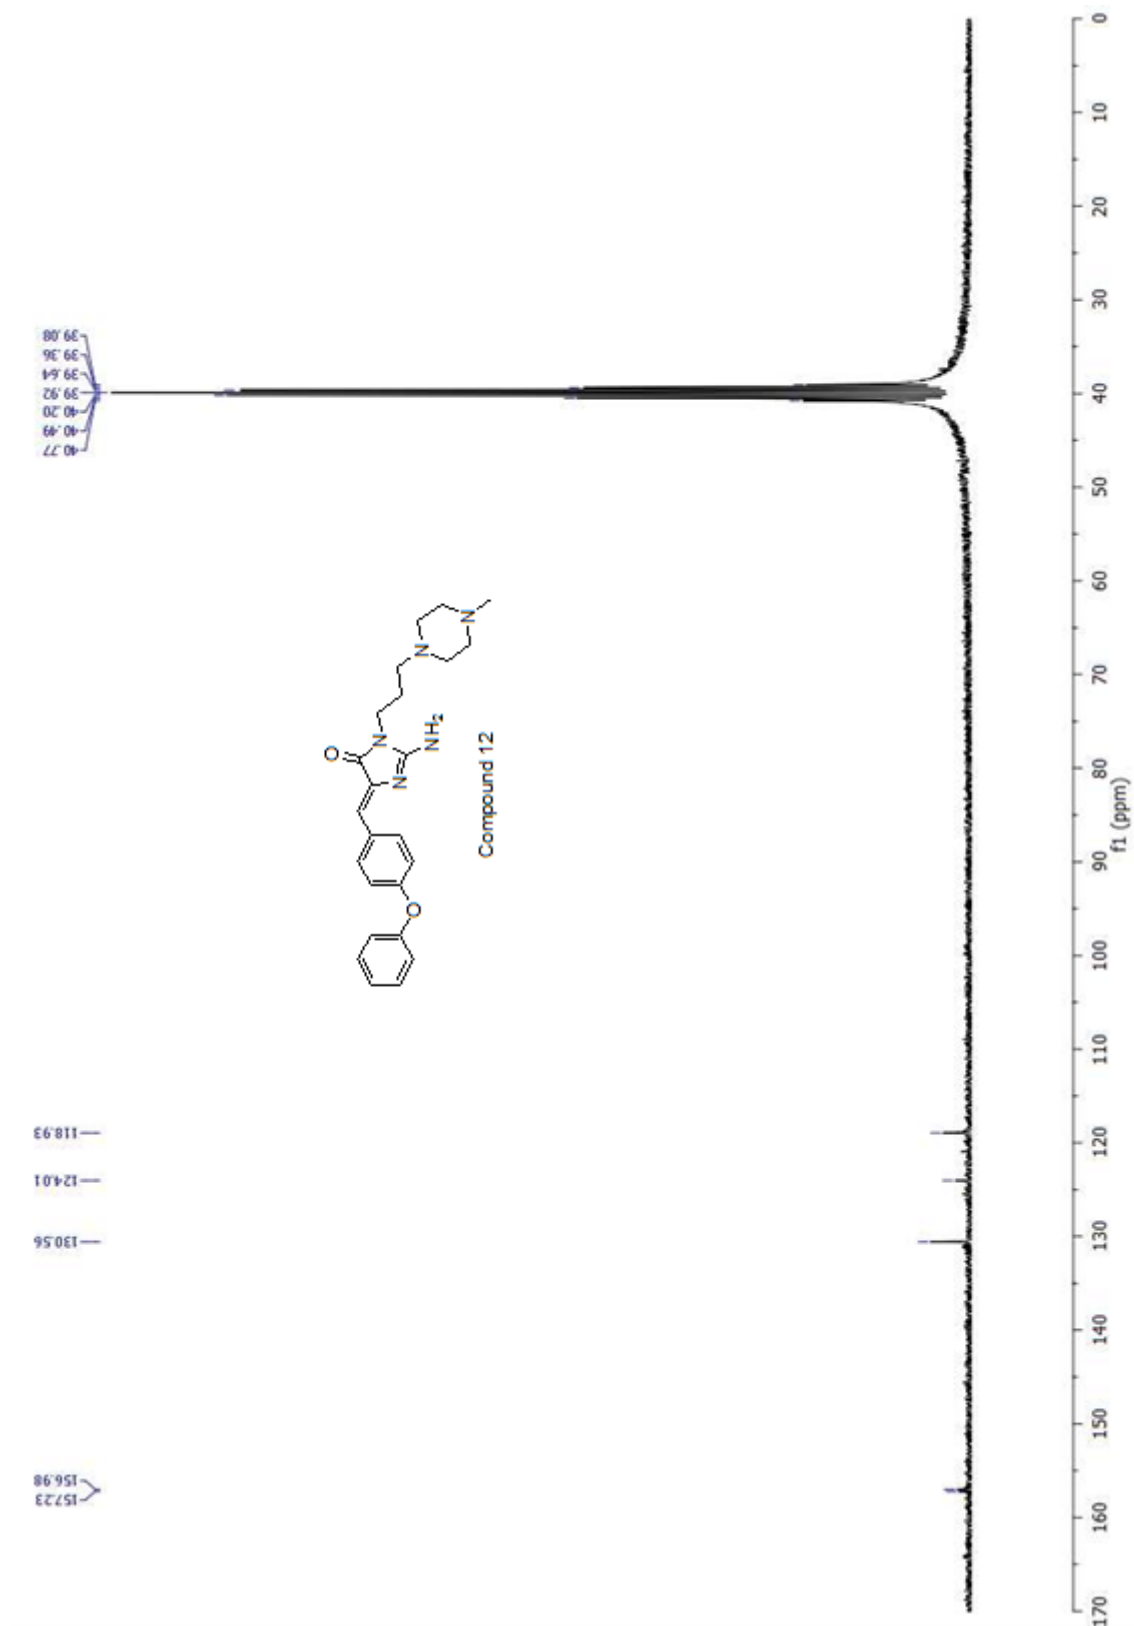

# Compound 13

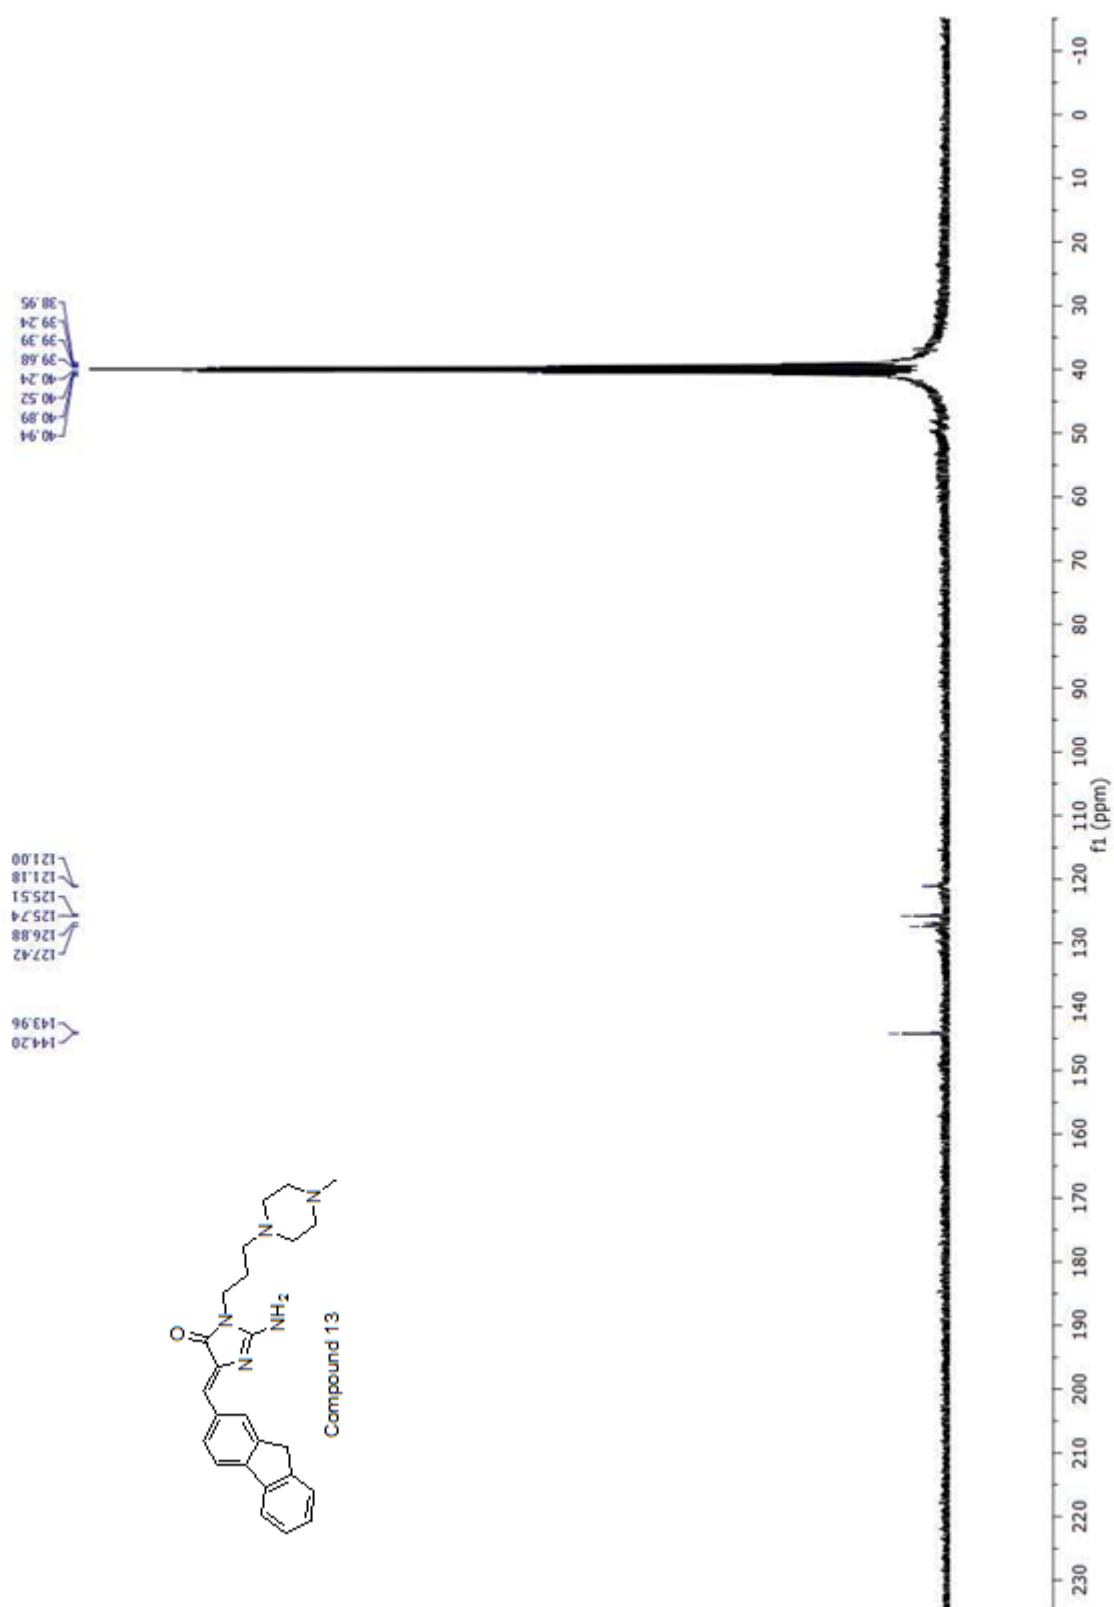

# Compound 14

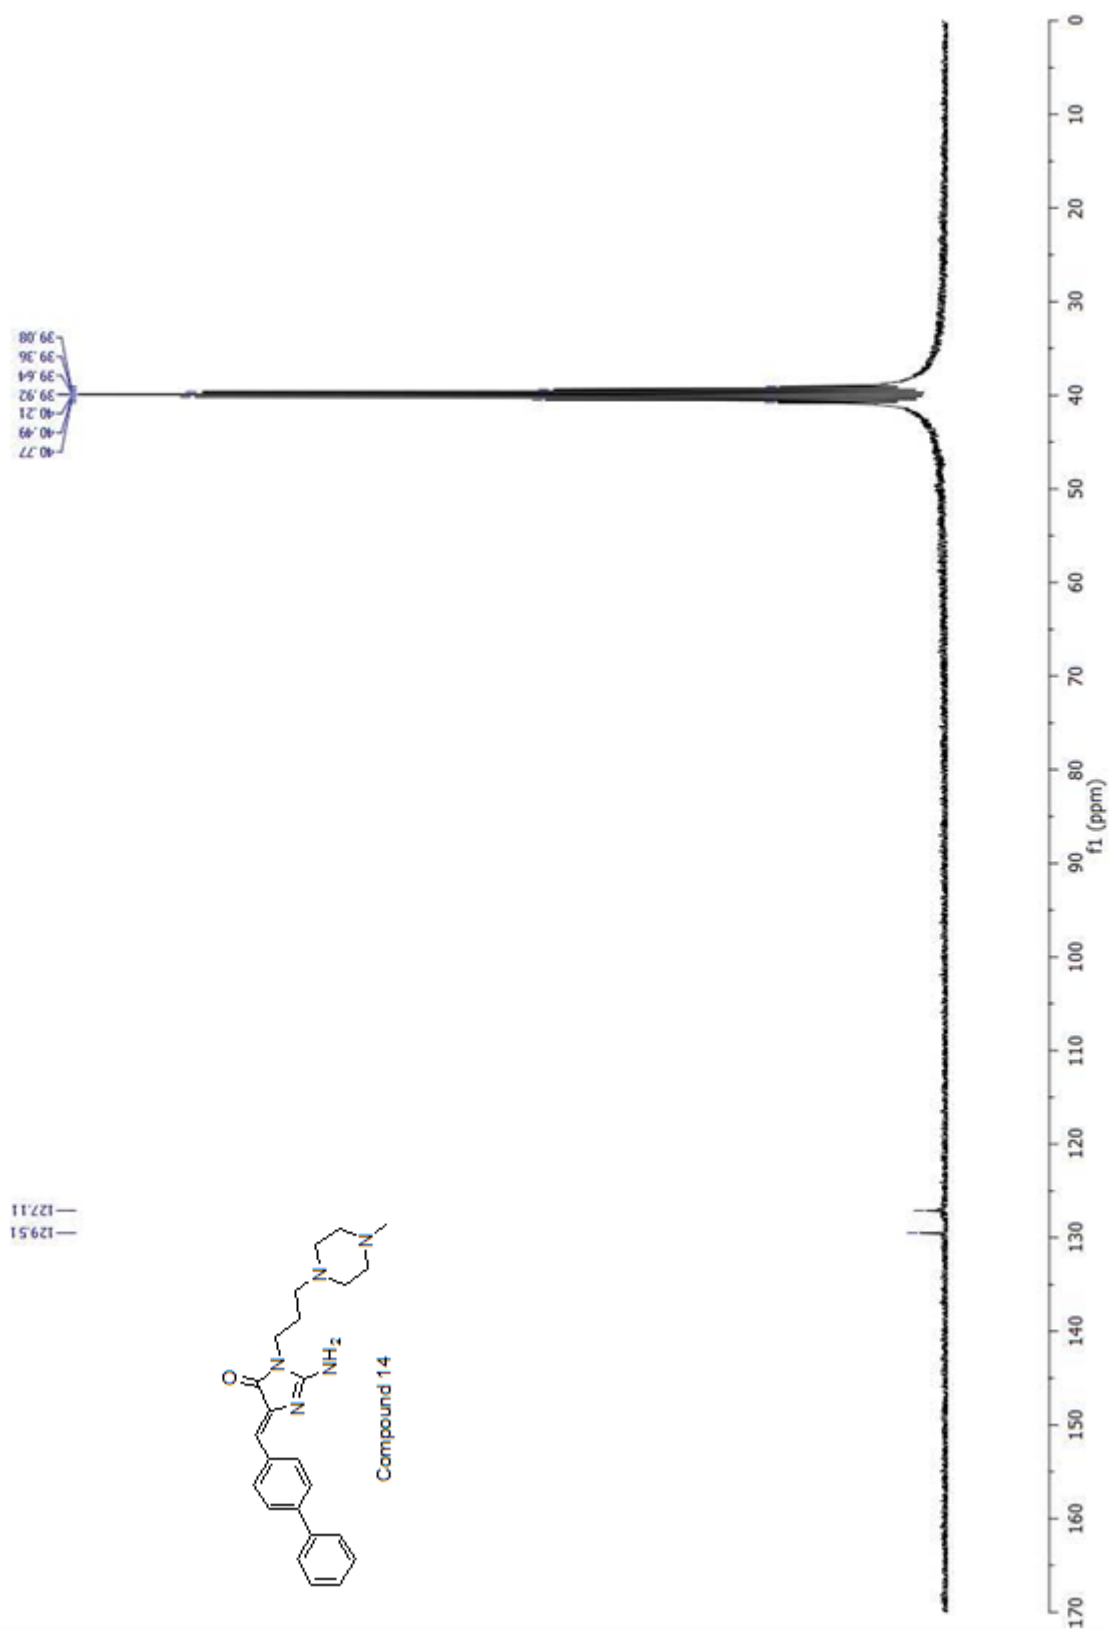

# Compound 15

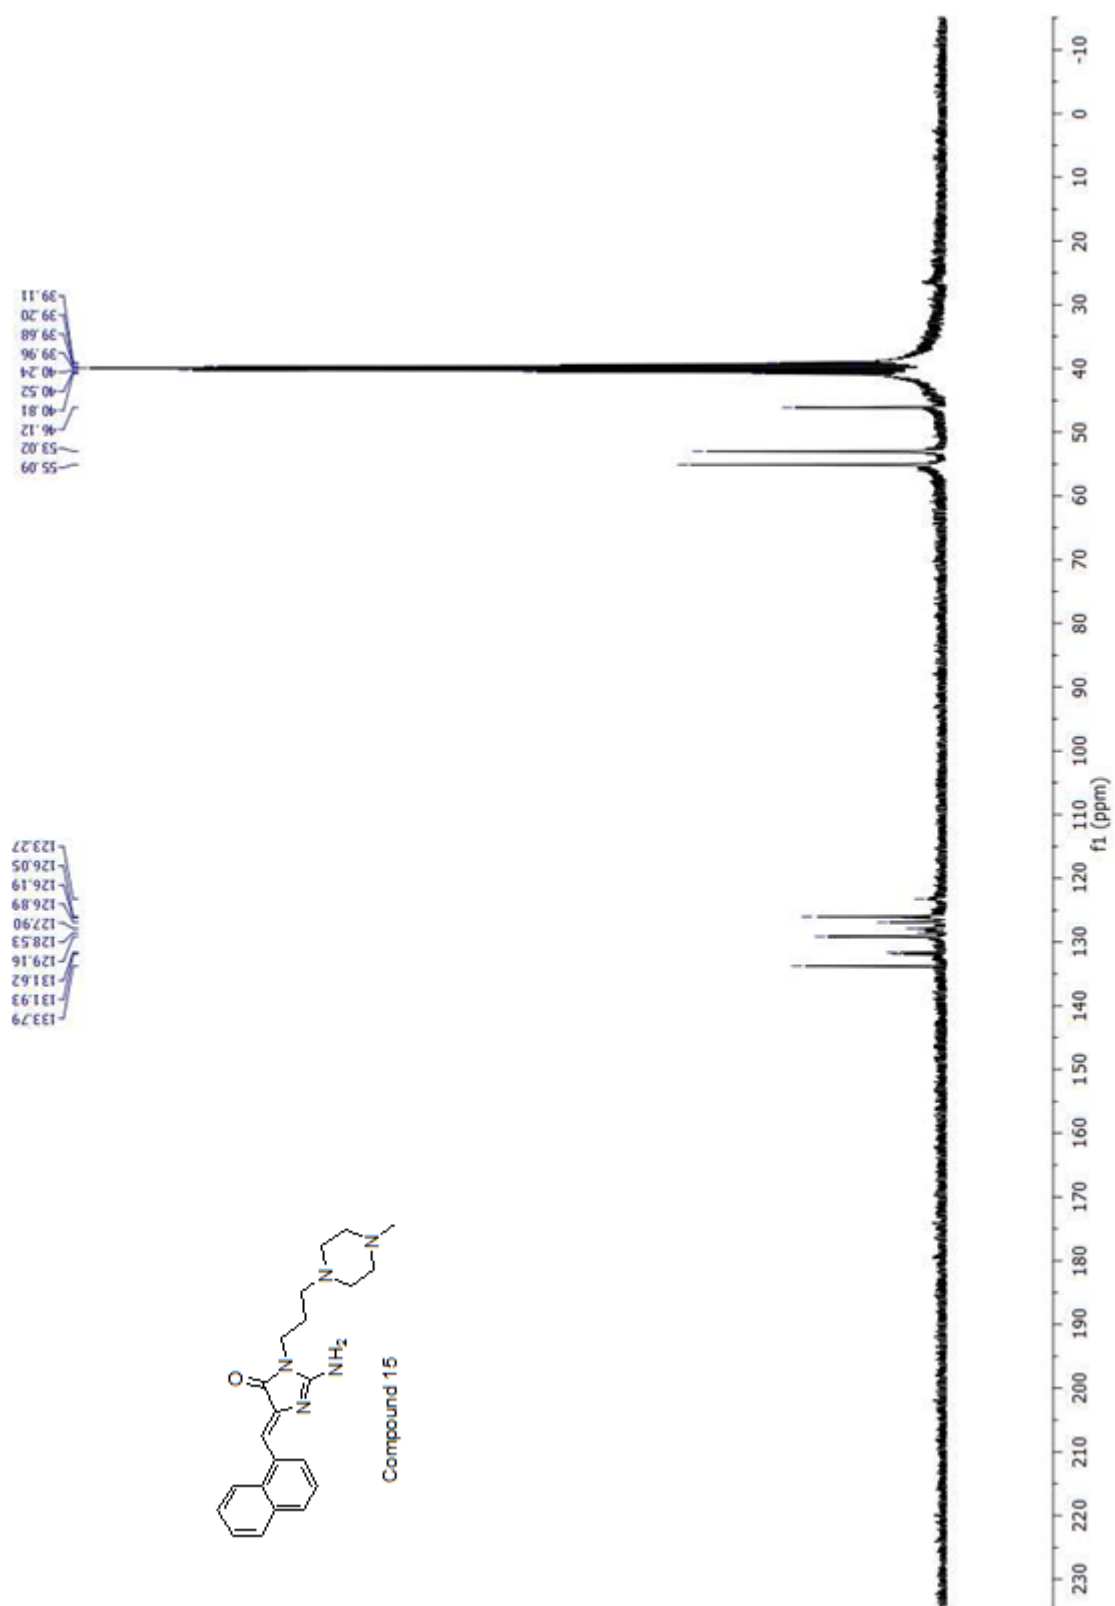



# Compound 16

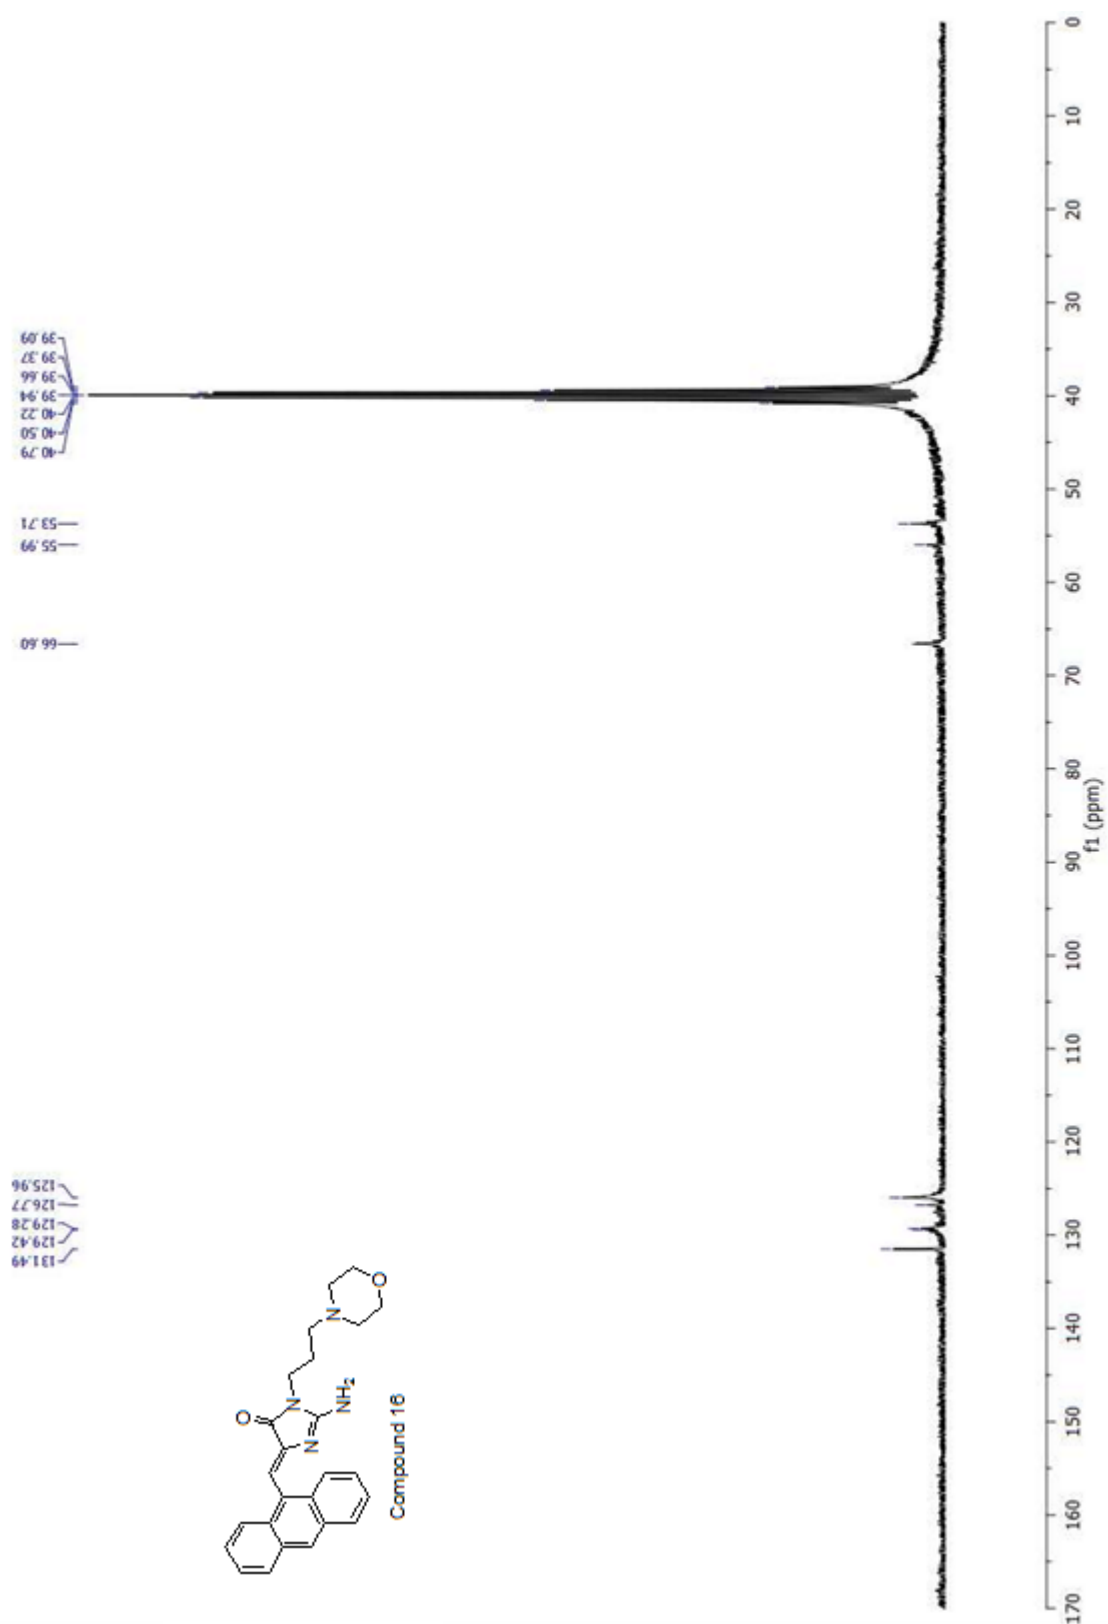

# Compound 17

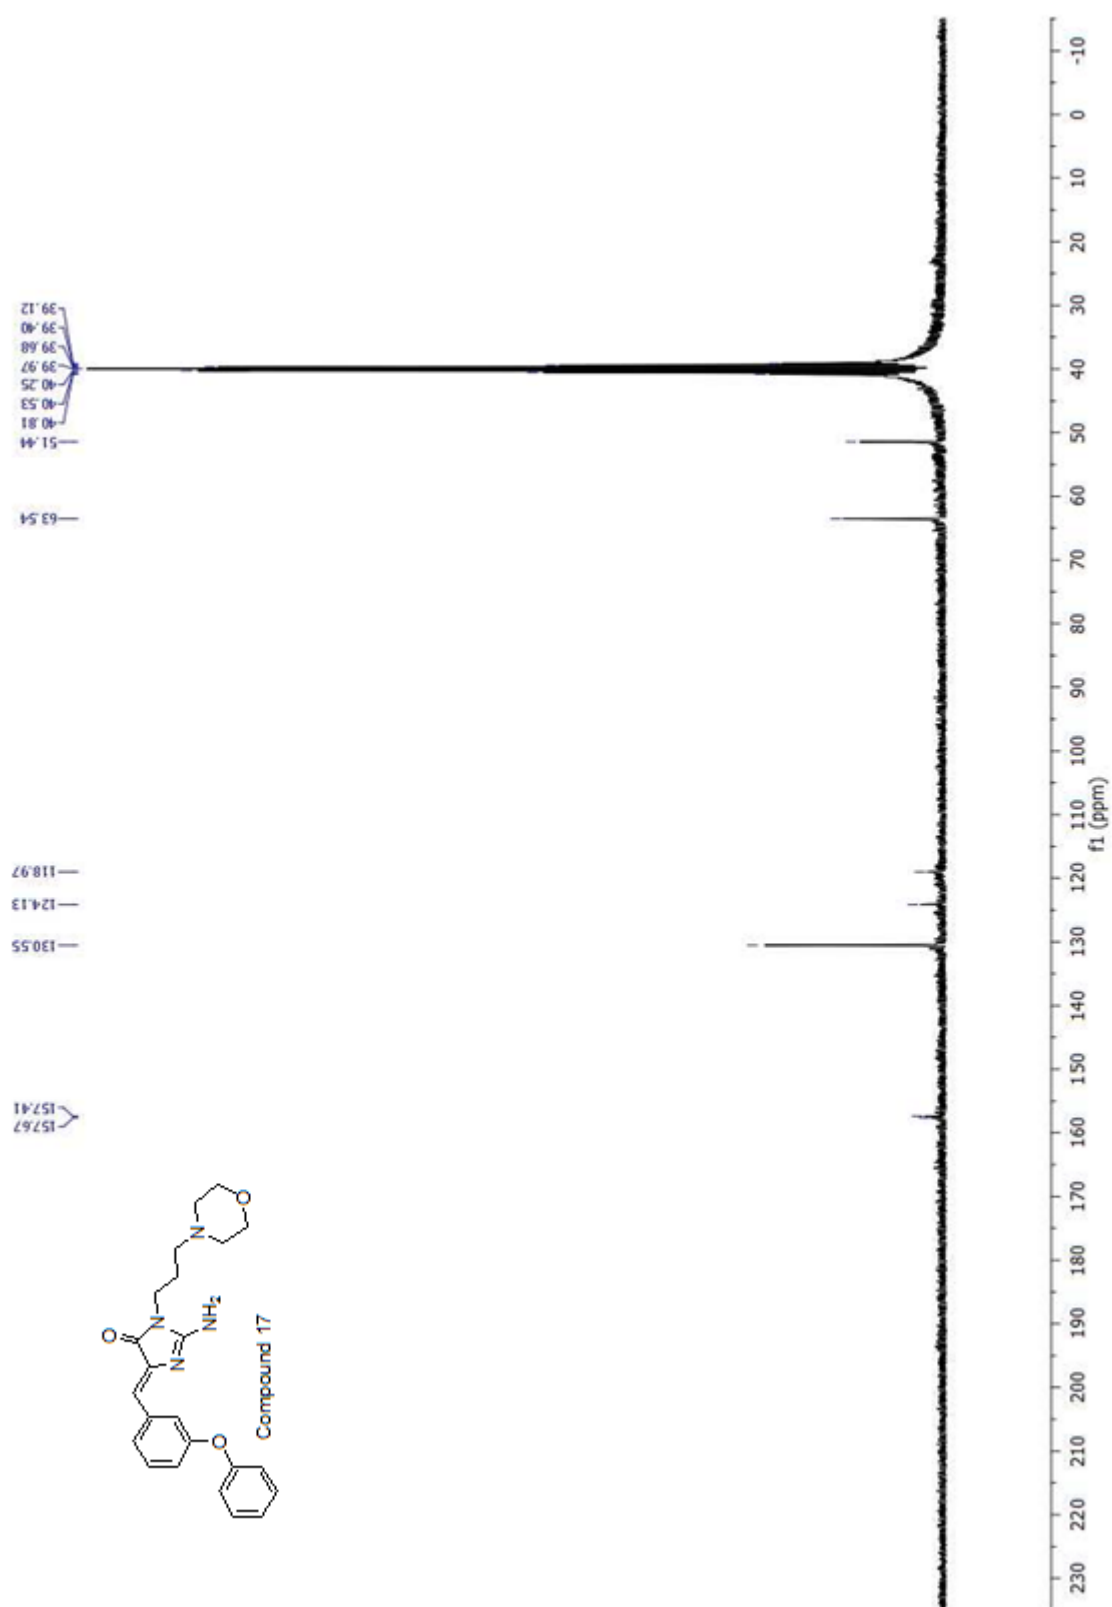

## Studies in silico

Ligand interaction diagrams for poses obtained in docking; grid centering at S240.

- |                      |                              |                        |                    |
|----------------------|------------------------------|------------------------|--------------------|
| ● Charged (negative) | ● Polar                      | --- Distance           | — Salt bridge      |
| ● Charged (positive) | ● Unspecified residue        | --- H-bond             | ○ Solvent exposure |
| ● Glycine            | ● Water                      | --- Metal coordination |                    |
| ● Hydrophobic        | ● Hydration site             | --- Pi-Pi stacking     |                    |
| ● Metal              | ● Hydration site (displaced) | --- Pi-cation          |                    |

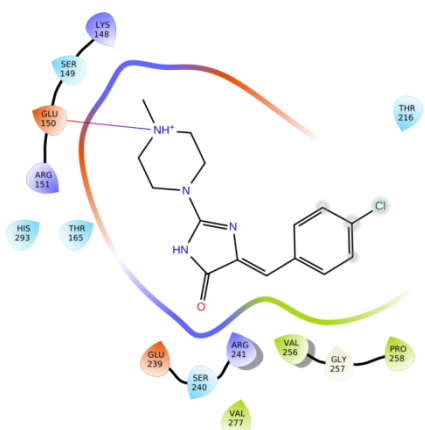

Compound 6

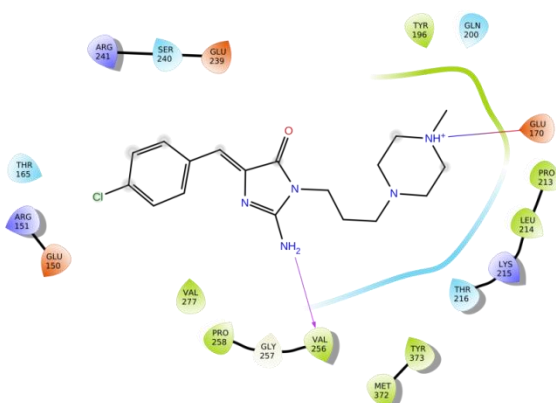

Compound 7

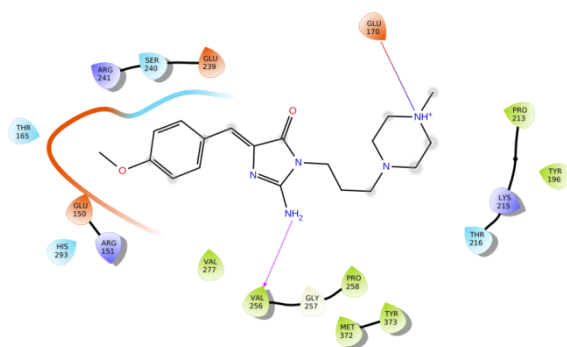

Compound 8

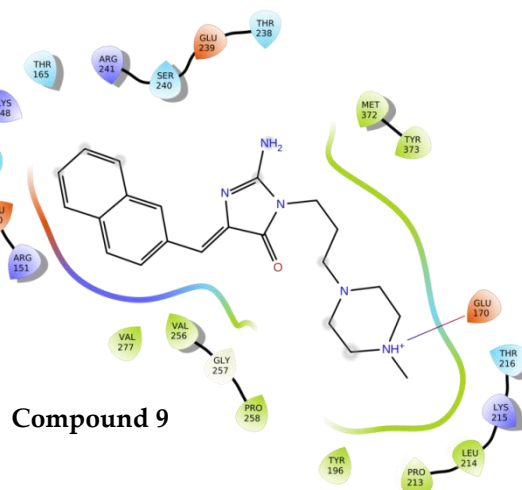

Compound 9

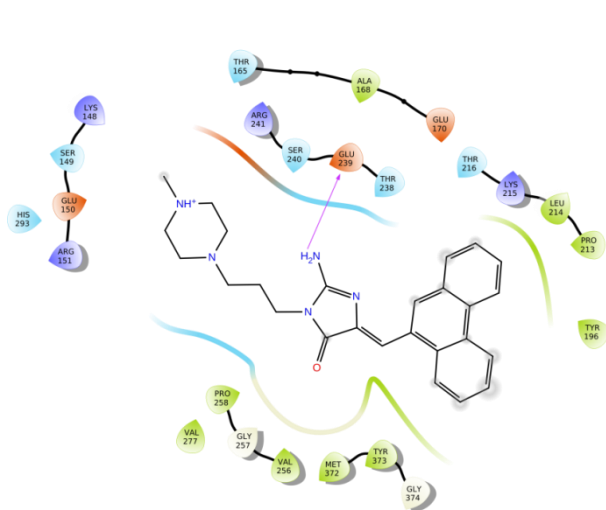

Compound 10

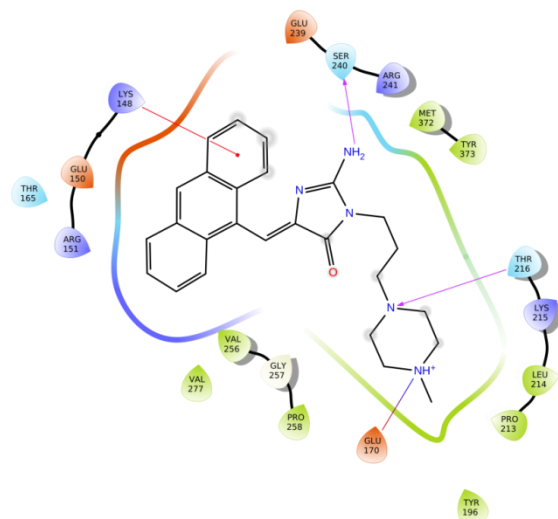

Compound 11

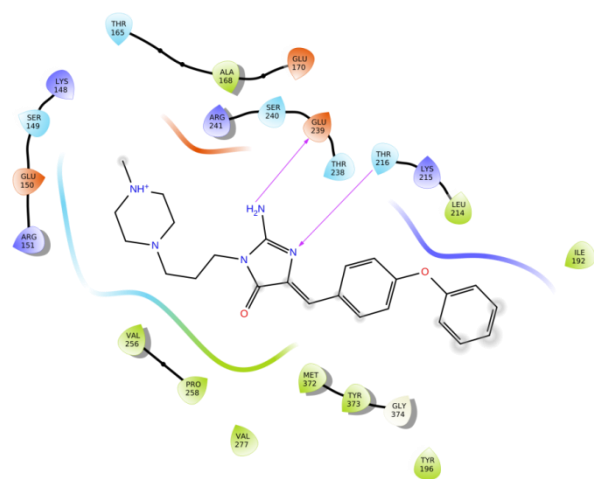

Compound 12

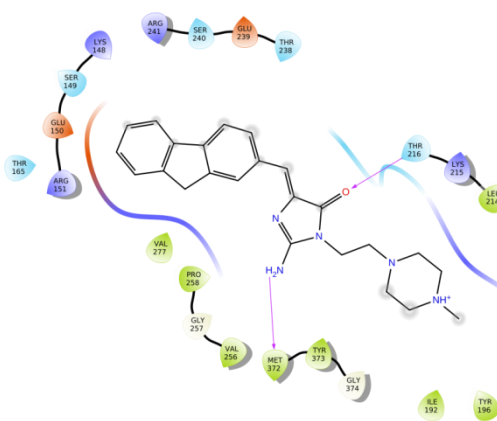

Compound 13

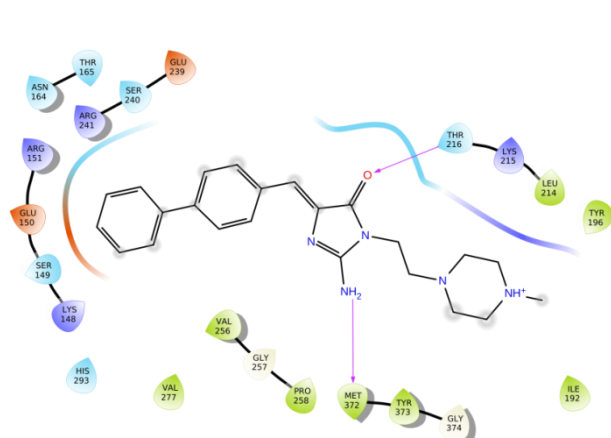

Compound 14

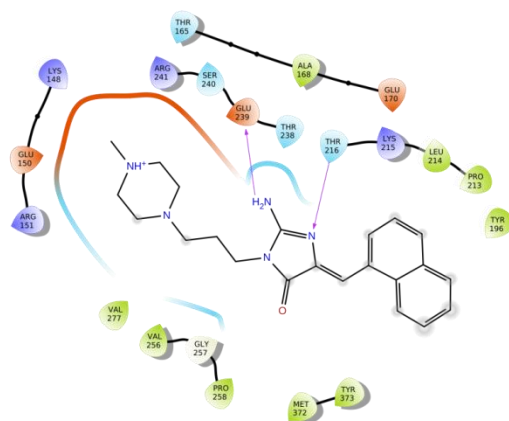

Compound 15

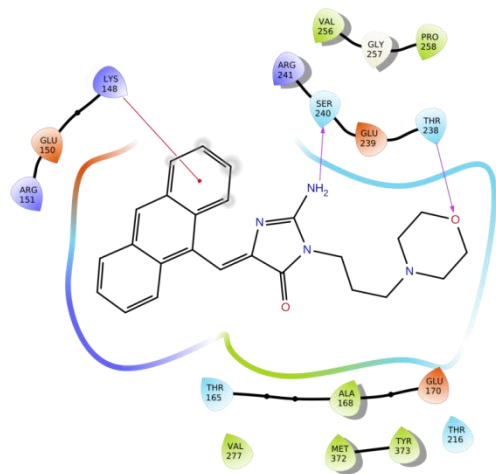

Compound 16

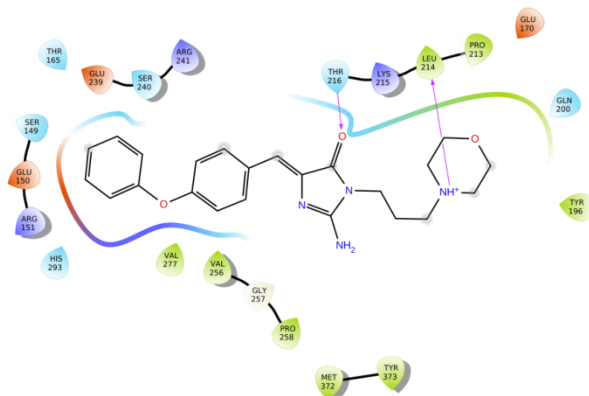

Compound 17

## Ligand interaction diagrams for poses obtained in docking; grid centering at S403.

- |                    |                            |                    |                  |
|--------------------|----------------------------|--------------------|------------------|
| Charged (negative) | Polar                      | Distance           | Salt bridge      |
| Charged (positive) | Unspecified residue        | H-bond             | Solvent exposure |
| Glycine            | Water                      | Metal coordination |                  |
| Hydrophobic        | Hydration site             | Pi-Pi stacking     |                  |
| Metal              | Hydration site (displaced) | Pi-cation          |                  |

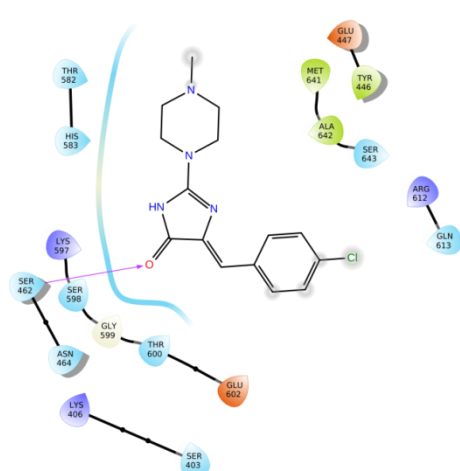

Compound 6

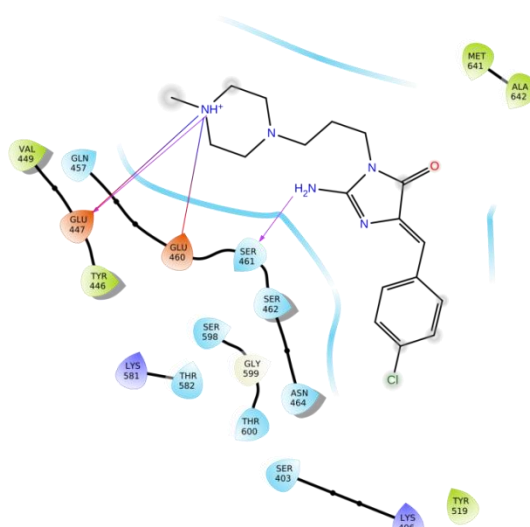

Compound 7

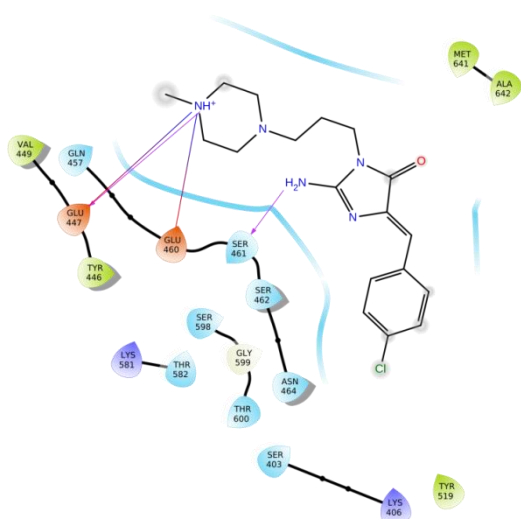

Compound 8

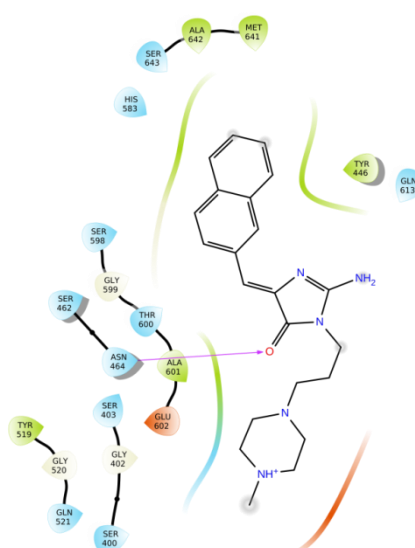

Compound 9

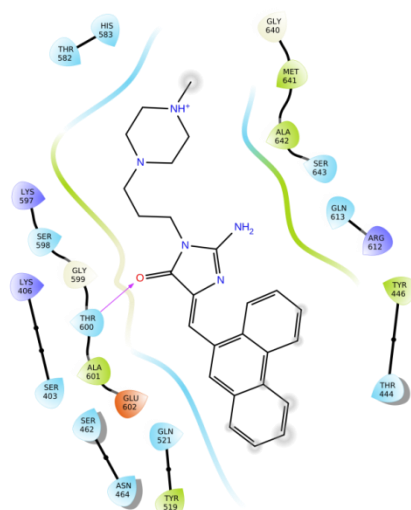

Compound 10

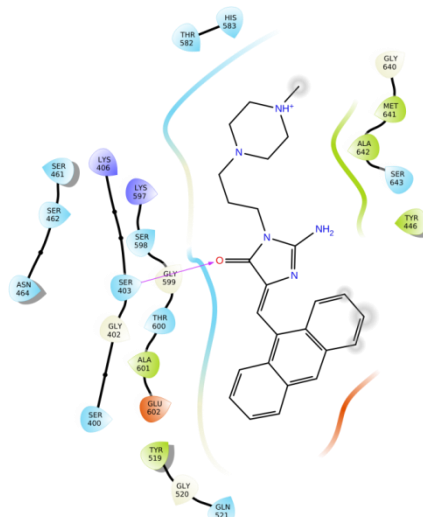

Compound 11

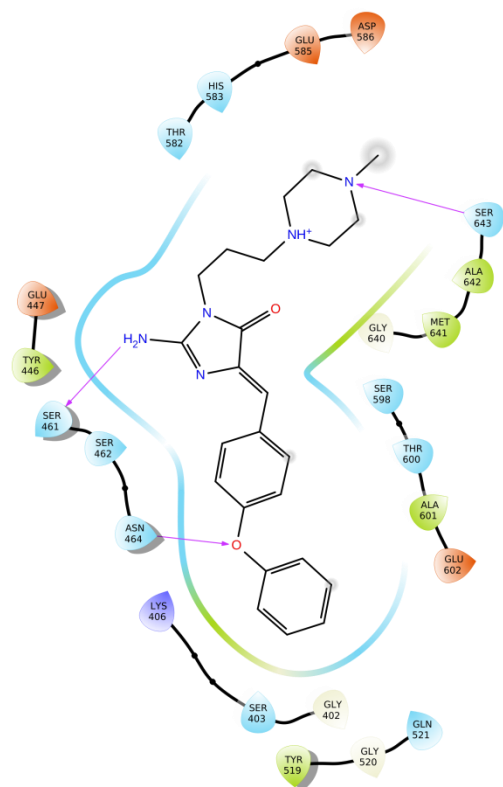

Compound 12

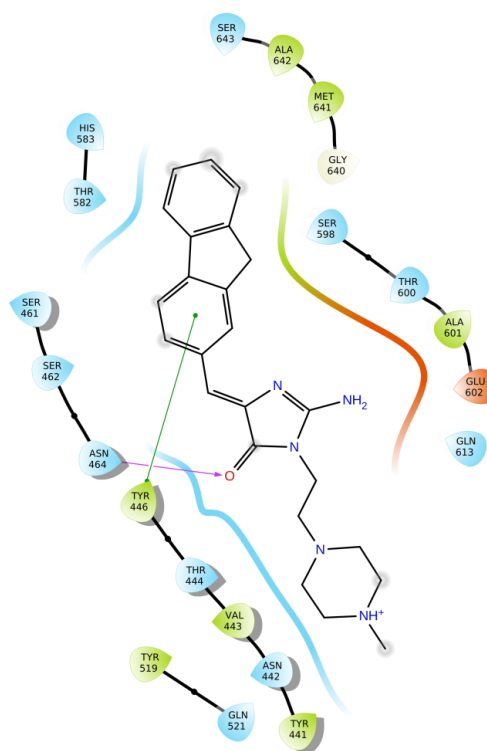

Compound 13

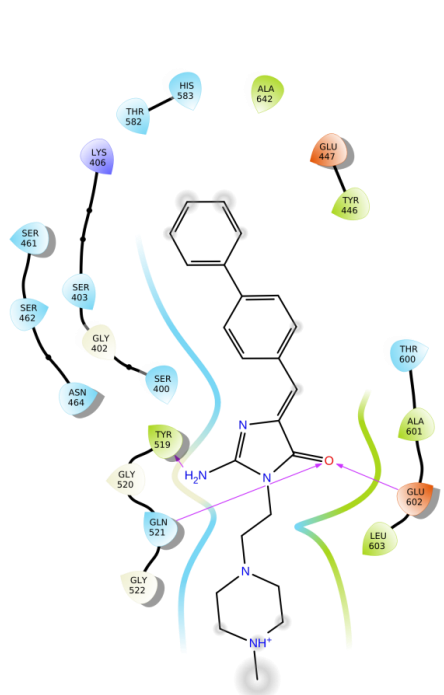

Compound 14

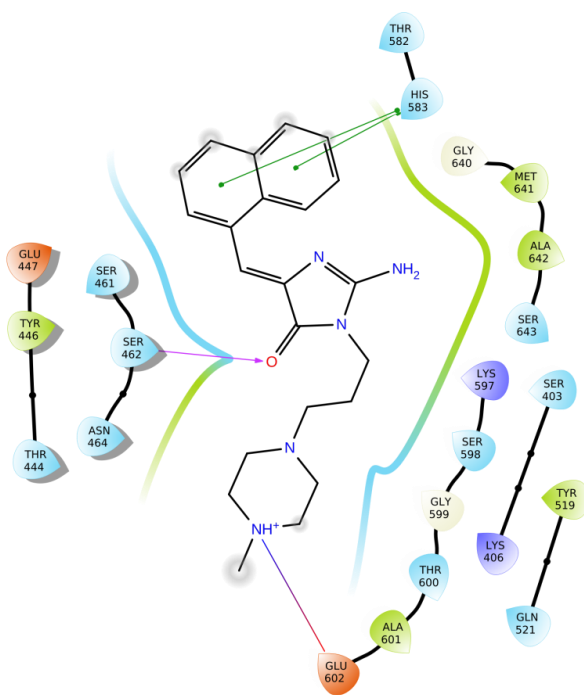

Compound 15

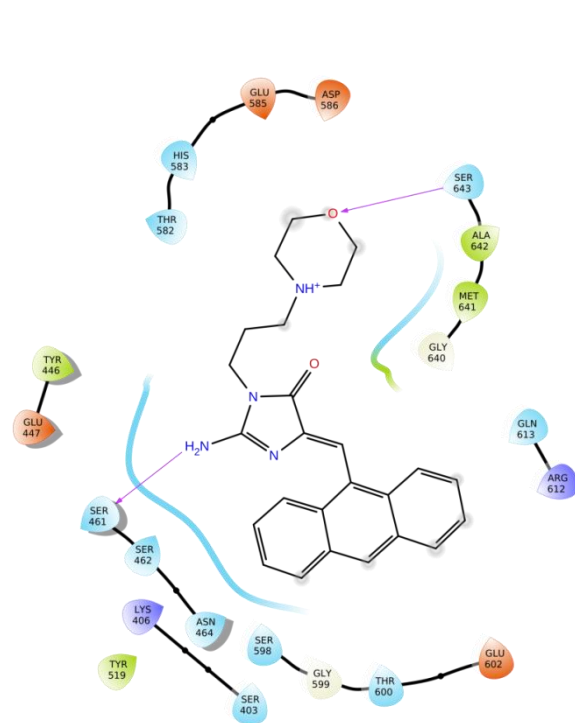

Compound 16

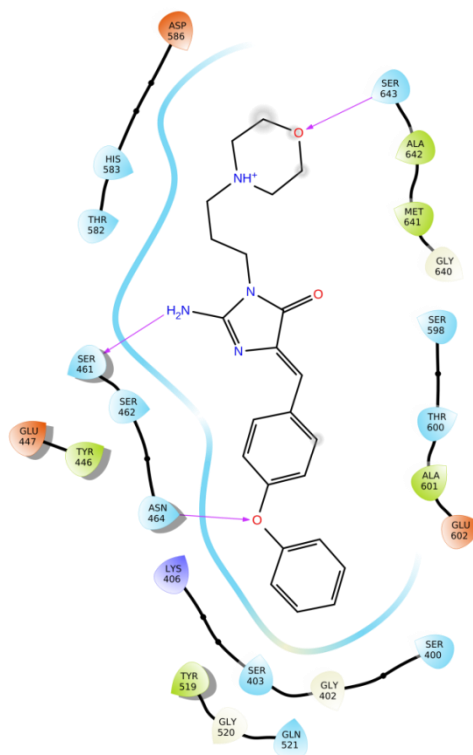

Compound 17



**Simulation interaction diagrams from molecular dynamic simulations; grid centering at S240.**

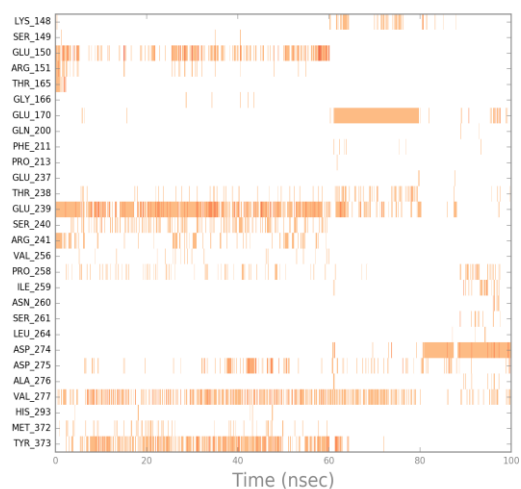

**Compound 6**

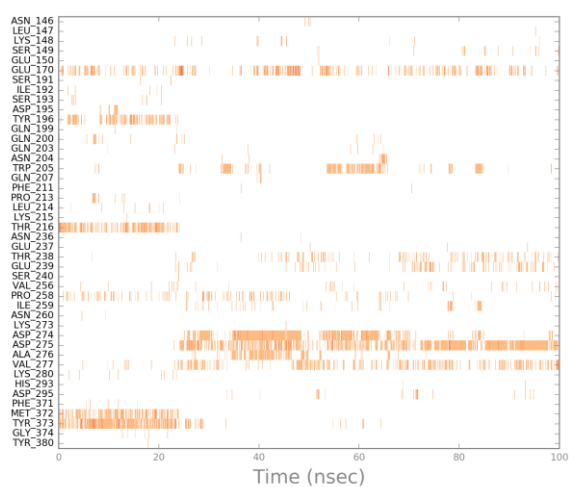

**Compound 7**

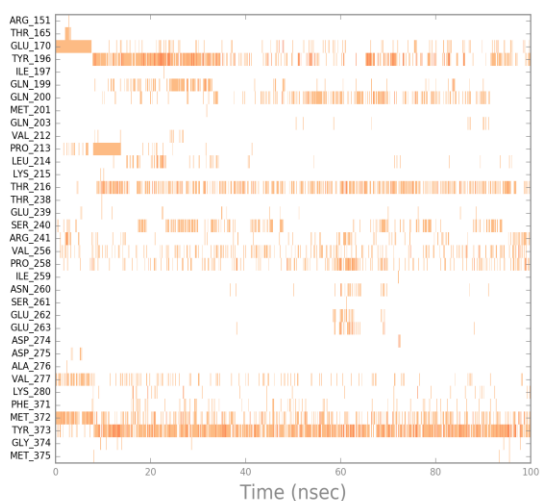

**Compound 8**

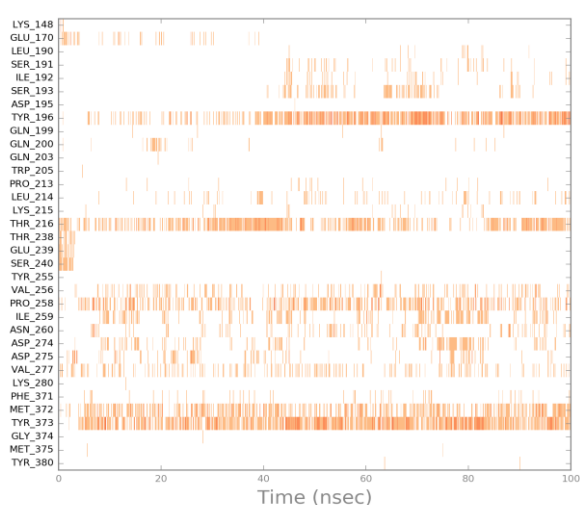

**Compound 9**

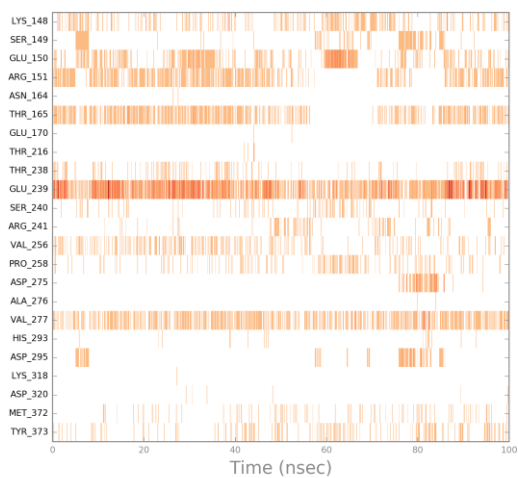

**Compound 10**

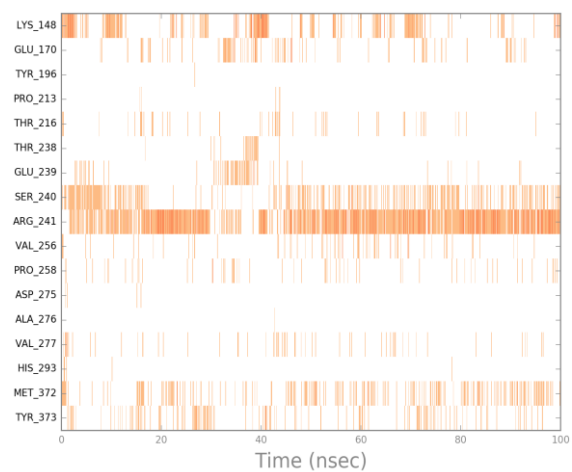

**Compound 11**

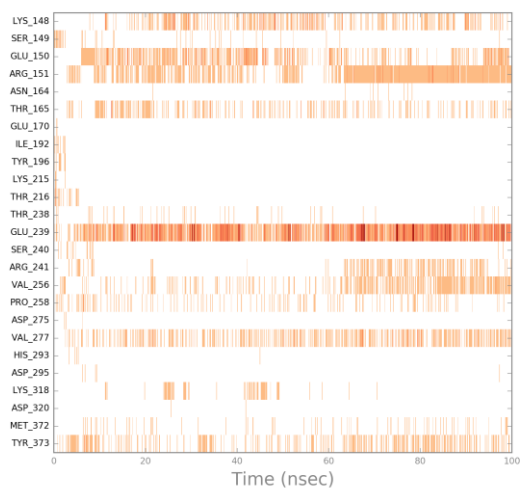

**Compound 12**

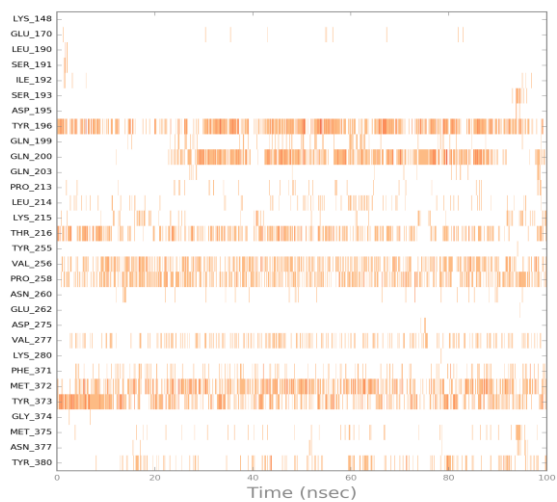

**Compound 13**

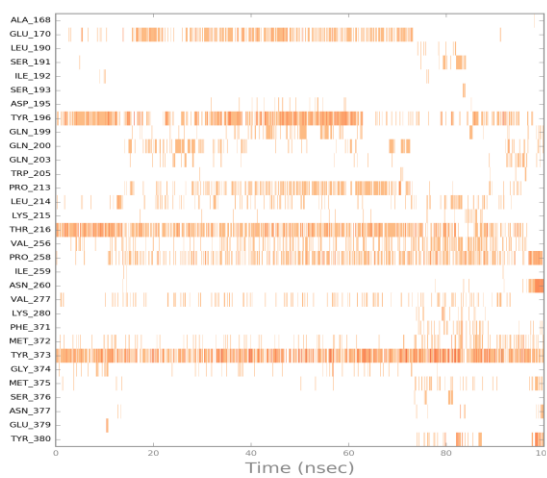

**Compound 14**

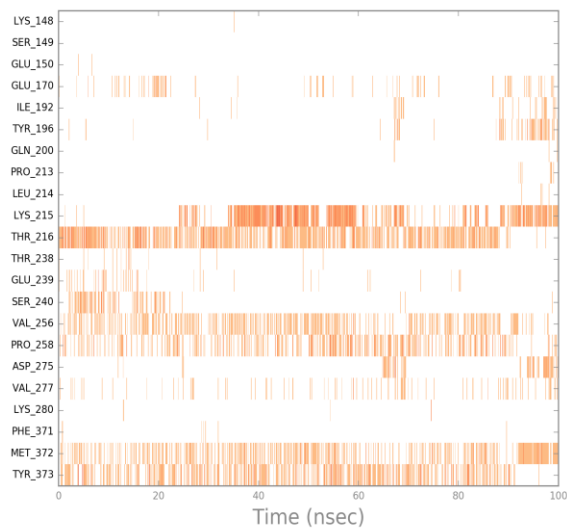

**Compound 15**

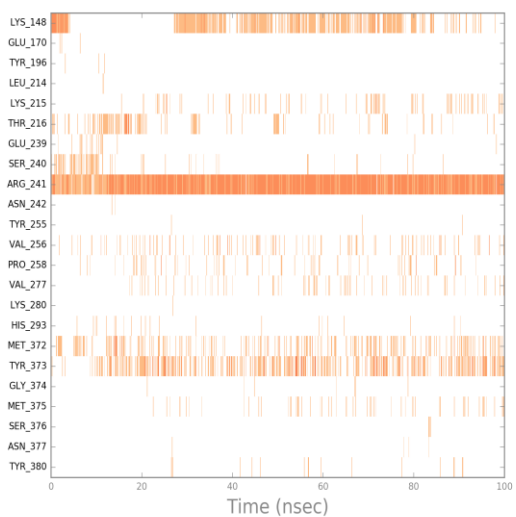

**Compound 16**

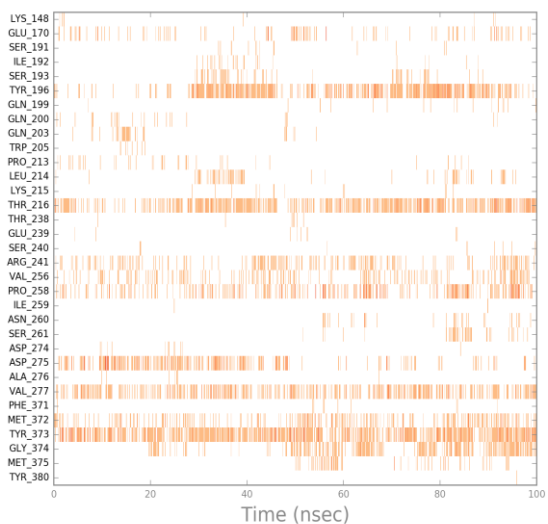

**Compound 17**

Simulation interaction diagrams from molecular dynamic simulations; grid centering at S403.

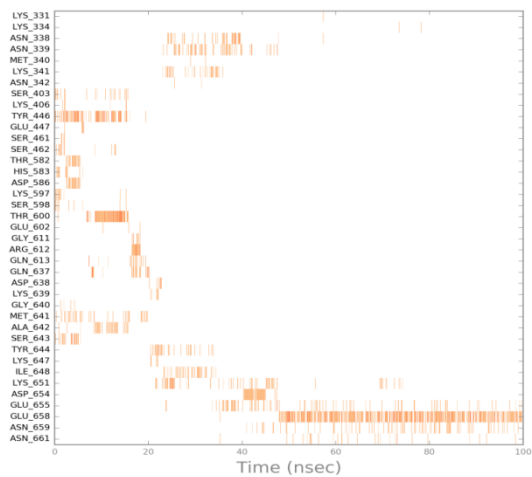

**Compound 6**

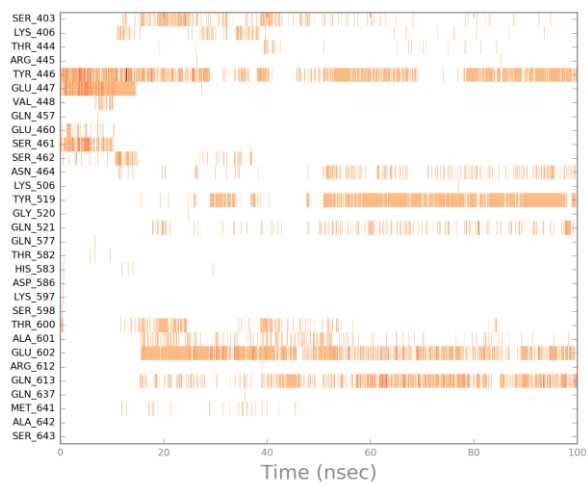

**Compound 7**

**Compound 8** diffused away from the protein during simulation.

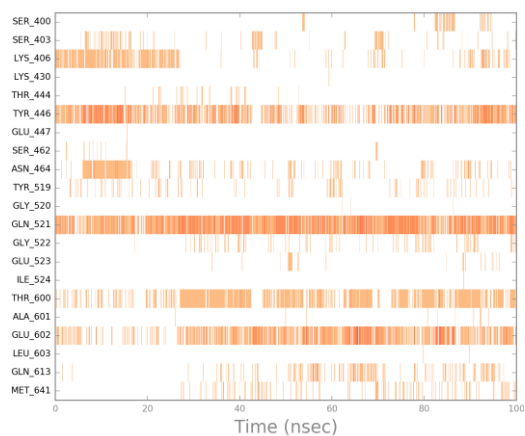

**Compound 9**

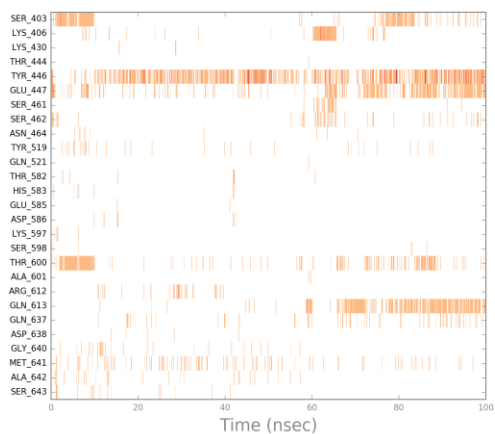

**Compound 10**

**Compound 11** diffused away from the protein during simulation.

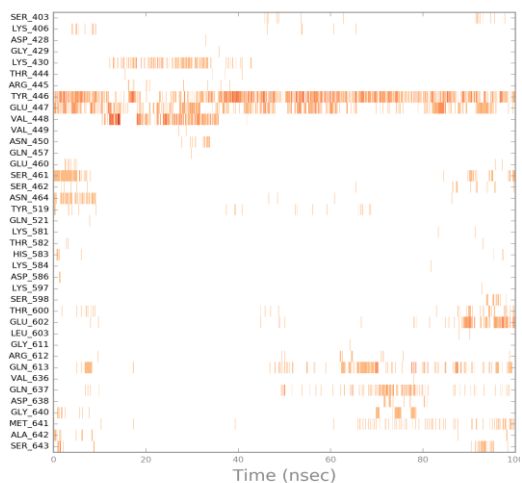

**Compound 12**

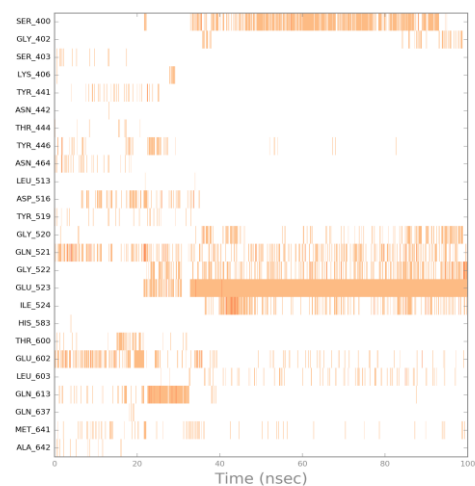

**Compound 13**

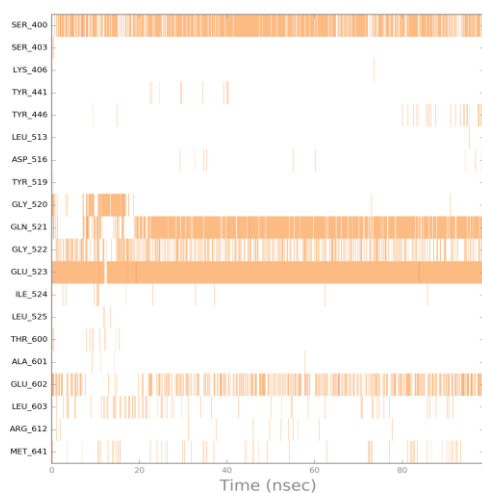

**Compound 14**

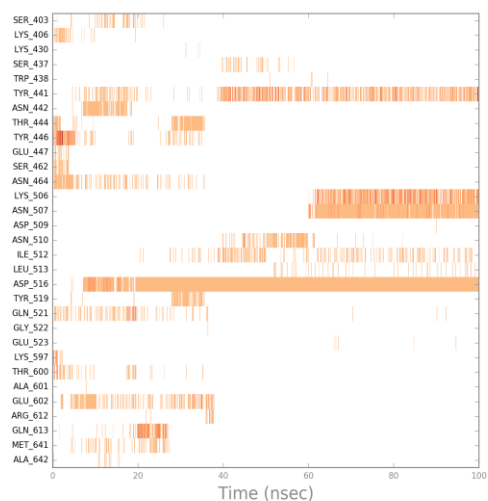

**Compound 15**

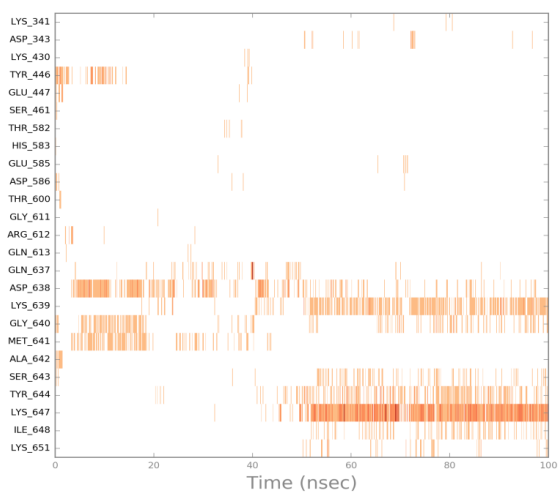

**Compound 16**

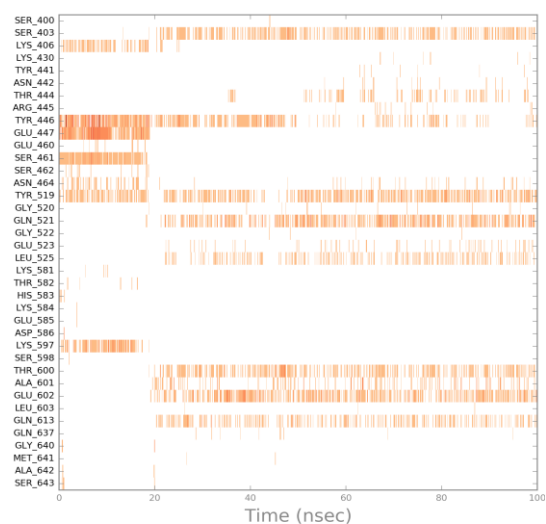

**Compound 17**
